# Supplementary material for: Integrating AI/ML Models for Patient Stratification Leveraging Omics Dataset and Clinical Biomarkers from COVID-19 Patients: A Promising Approach to Personalized Medicine
Source: Preprints.org preprint supplement (doi:10.20944/preprints202303.0009.v1), 2023-03-01
Supplement: Supplementary file 1 [file supplementary]

**SUPPLEMENTARY DATA**

**Integrating AI/ML Models for Patient Stratification Leveraging Omics Dataset and Clinical Biomarkers from COVID-19 Patients: A Promising Approach to Personalized Medicine**

**Babatunde Bello, Yogesh N. Bundey, Roshan Bhave, Maksim Khotimchenko, Szczepan W. Baran, Kaushik Chakravarty and Jyotika Varshney**

**Table 1.** Clinical data columns for ML workflow

| **Column Group** | **Column Group Definitions** | **Columns** |
| --- | --- | --- |
| Basic Profile | Basic profile data for patient | Age, Height (cm), Weight (kg), BMI |
| Comorbidities | Presence of external comorbidity | Alcoholic Nonalcoholic Liver Disease present, Asthma present, Atrial Fibrillation present, Cancer Flag present, Chronic Kidney Disease present, Chronic Viral Hepatitis present, COPD present, Coronary Artery Disease present, Crohn’s Disease present, Diabetes present, Heart Failure present, Hypertension present, Obstructive Sleep Apnea present, Ulcerative Colitis present |
| Medications | Whether medication was given to patient | Apixaban given, Argatroban given, Azithromycin given, Dexamethasone given, Dobutamine given, Dopamine given, Eculizumab given, Enoxaparin given, Epinephrine given, Famotidine given, Gimisilumab given, Heparin given, Hydrocortisone given, Hydroxychloroquine given, Methotrexate given, Methylprednisolone given, Milrinone given, Norepinephrine Levophed given, No Ppm given, Phenylephrine given, Prednisone given, Remdesivir given, Rituximab given, Rivaroxaban given, Sarilumab given, Tissue Plasminogen Activator given, Tocilizumab given, Vasopressin Vasostrict given, Warfarin Coumadin given |
| Lab Results | Lab value of selected biomarker | Median Albumin lab value, Median Alt lab value, Median Anion Gap lab value, Median Ast lab value, Median Base Excess Arterial lab value, Median Base Excess Venous lab value, Median Basophil Number lab value, Median Basophil Percent lab value, Median Brain Natriuretic Protein lab value, Median Bun lab value, Median Calcium lab value, Median Carboxyhemoglobin Arterial lab value, Median Chloride lab value, Median Co2 Total lab value, Median Creatine Kinase Mb lab value, Median Creatine Kinase lab value, Median C Reactive Protein lab value, Median C Reative Protein Hs lab value, Median Deoxyhemoglobin Arterial lab value, Median D Dimer lab value, Median Egfr lab value, Median Eosinophil Number lab value, Median Eosinophil Percent lab value, Median Esr lab value, Median Ferritin lab value, Median Fibrinogen lab value, Median Glucose lab value, Median Haptoglobin lab value, Median Hco3 Arterial lab value, Median Hco3 Venous lab value, Median Hematocrit lab value, Median Hemoglobin A1C lab value, Median Hemoglobin Arterial lab value, Median Hemoglobin lab value, Median Inr lab value, Median Interleukin 1 Beta lab value, Median Interleukin 6 lab value, Median Interleukin 8 lab value, Median Lactate Arterial lab value, Median Ldh lab value, Median Lymphocyte Number lab value, Median Lymphocyte Percent lab value, Median Mchc lab value, Median Mch lab value, Median Mcv lab value, Median Mean Platelet Volume lab value, Median Methemoglobin Arterial lab value, Median Monocyte Number lab value, Median Monocyte Percent lab value, Median Neutrophil Number lab value, Median Neutrophil Percent lab value, Median O2 Saturation Arterial lab value, Median O2 Saturation Venous lab value, Median Oxyhemoglobin Arterial lab value, Median Pc02 Venous lab value, Median Pco2 Arterial lab value, Median Ph Arterial lab value, Median Ph Venous lab value, Median Platelet lab value, Median Po2 Arterial lab value, Median Po2 Venous lab value, Median Potassium lab value, Median Procalcitonin lab value, Median Prothrombin Time lab value, Median Ptt lab value, Median Rbc Count lab value, Median Serum Creatinine lab value, Median Sodium lab value, Median Tnf Alpha lab value, Median Total Bilirubin lab value, Median Total Protein lab value, Median Troponin I lab value, Median Uric Acid lab value, Median Wbc lab value, Maximum C Reactive Protein lab value, Maximum D Dimer lab value, Interquartile Range C Reactive Protein lab value, Interquartile Range D Dimer lab value, Minimum C Reactive Protein lab value, Minimum D Dimer lab value, Minimum Serum Creatinine lab value, Standard Deviation C Reactive Protein lab value, Standard Deviation D Dimer lab value, Mean C Reactive Protein lab value, Mean D Dimer lab value, Mean Mean Platelet Volume Median lab value, Number of C Reactive Protein observed - lab value, Number of D Dimer observed - lab value |
| Others | Maximum sequential organ failure assessment (SOFA) score recorded during the 24-hour period | SOFA Score |

**Table 2.** Modeling Results for Severity and Outcome predictive models

|  | **Severity** | **Survival** |
| --- | --- | --- |
| Balanced Accuracy | 91.6% | 99.1% |
| ROC-AUC | 98.1% | 99.9% |
| ROC Curve | 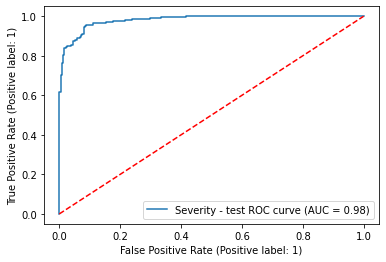 | 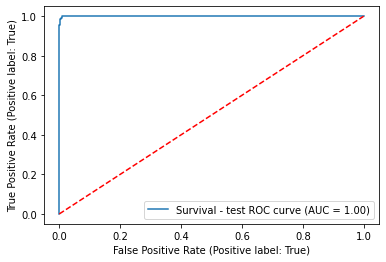 |

**Table 3.** Modeling Results for Severity and Outcome predictive models without comorbidities in the training set

|  | **Severity** | **Survival** |
| --- | --- | --- |
| Balanced Accuracy | 85.4% | 69.8% |
| ROC-AUC | 93.5% | 87.8% |
| ROC Curve | 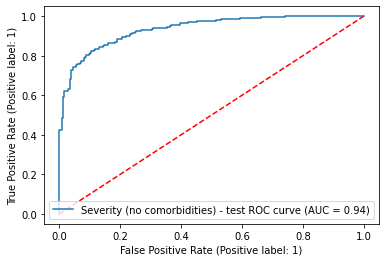 | 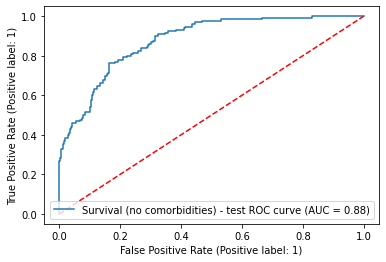 |

Table 4. Percentage of missing values per column within clinical biomarker training data

| **Column** | **Percent Missing (%)** |
| --- | --- |
| Age | 0 |
| BMI | 0.67 |
| Alcoholic Nonalcoholic Liver Disease present | 0 |
| Asthma present | 0 |
| Atrial Fibrillation present | 0 |
| Cancer Flag present | 0 |
| Chronic Kidney Disease present | 0 |
| Chronic Viral Hepatitis present | 0 |
| Copd present | 0 |
| Coronary Artery Disease present | 0 |
| Crohns Disease present | 0 |
| Diabetes present | 0 |
| Heart Failure present | 0 |
| Htn present | 0 |
| Obstructive Sleep Apnea present | 0 |
| Ulcerative Colitis present | 0 |
| Height (cm) | 2.5 |
| Median Albumin lab value | 23.99 |
| Median Alt lab value | 25.13 |
| Median Anion Gap lab value | 11.33 |
| Median Ast lab value | 25.6 |
| Median Base Excess Arterial lab value | 97.4 |
| Median Base Excess Venous lab value | 68.47 |
| Median Basophil Number lab value | 35.24 |
| Median Basophil Percent lab value | 20.09 |
| Median Brain Natriuretic Protein lab value | 91.86 |
| Median Bun lab value | 12 |
| Median Calcium lab value | 11.74 |
| Median Carboxyhemoglobin Arterial lab value | 83.5 |
| Median Chloride lab value | 10.87 |
| Median Co2 Total lab value | 11.72 |
| Median Creatine Kinase Mb lab value | 98.31 |
| Median Creatine Kinase lab value | 91.23 |
| Interquartile Range C Reactive Protein lab value | 39.96 |
| Maximum C Reactive Protein lab value | 39.96 |
| Mean C Reactive Protein lab value | 39.96 |
| Median C Reactive Protein lab value | 39.96 |
| Minimum C Reactive Protein lab value | 39.96 |
| Number of C Reactive Protein observed - lab value | 39.96 |
| Standard Deviation C Reactive Protein lab value | 94.68 |
| Median C Reative Protein Hs lab value | 98.7 |
| Median Deoxyhemoglobin Arterial lab value | 83.5 |
| Interquartile Range D Dimer lab value | 44.05 |
| Maximum D Dimer lab value | 44.05 |
| Mean D Dimer lab value | 44.05 |
| Median D Dimer lab value | 44.05 |
| Minimum D Dimer lab value | 44.05 |
| Number of D Dimer observed - lab value | 44.05 |
| Standard Deviation D Dimer lab value | 94.9 |
| Median Egfr lab value | 54.52 |
| Median Eosinophil Number lab value | 35.24 |
| Median Eosinophil Percent lab value | 20.09 |
| Median Esr lab value | 93.34 |
| Median Ferritin lab value | 42.01 |
| Median Fibrinogen lab value | 74 |
| Median Glucose lab value | 7.29 |
| Median Haptoglobin lab value | 97.87 |
| Median Hco3 Arterial lab value | 78.73 |
| Median Hco3 Venous lab value | 63.41 |
| Median Hematocrit lab value | 29.31 |
| Median Hemoglobin A1C lab value | 97.03 |
| Median Hemoglobin Arterial lab value | 80.91 |
| Median Hemoglobin lab value | 13.47 |
| Median Inr lab value | 47.76 |
| Median Interleukin 1 Beta lab value | 95.54 |
| Median Interleukin 6 lab value | 89.97 |
| Median Interleukin 8 lab value | 92.98 |
| Median Lactate Arterial lab value | 78.53 |
| Median Ldh lab value | 46.07 |
| Median Lymphocyte Number lab value | 35.24 |
| Median Lymphocyte Percent lab value | 20.06 |
| Median Mchc lab value | 13.49 |
| Median Mch lab value | 13.49 |
| Median Mcv lab value | 13.49 |
| Mean Value lab value | 13.87 |
| Median Methemoglobin Arterial lab value | 85.09 |
| Median Monocyte Number lab value | 35.24 |
| Median Monocyte Percent lab value | 20.06 |
| Median Neutrophil Number lab value | 18.93 |
| Median Neutrophil Percent lab value | 20.06 |
| Median O2 Saturation Arterial lab value | 78.86 |
| Median O2 Saturation Venous lab value | 62.93 |
| Median Oxyhemoglobin Arterial lab value | 79.69 |
| Median Pc02 Venous lab value | 60.26 |
| Median Pco2 Arterial lab value | 76.57 |
| Median Ph Arterial lab value | 76.59 |
| Median Ph Venous lab value | 60.27 |
| Median Platelet lab value | 14.58 |
| Median Po2 Arterial lab value | 76.58 |
| Median Po2 Venous lab value | 60.62 |
| Median Potassium lab value | 11.69 |
| Median Procalcitonin lab value | 58.49 |
| Median Prothrombin Time lab value | 47.76 |
| Median Ptt lab value | 48.68 |
| Median Rbc Count lab value | 13.49 |
| Median Serum Creatinine lab value | 11.79 |
| Minimum Serum Creatinine lab value | 11.79 |
| Median Sodium lab value | 25.47 |
| Median Tnf Alpha lab value | 92.98 |
| Median Total Bilirubin lab value | 24.28 |
| Median Total Protein lab value | 24.5 |
| Median Troponin I lab value | 87.67 |
| Median Uric Acid lab value | 95.5 |
| Median Wbc lab value | 13.7 |
| Apixaban given | 0 |
| Argatroban given | 0 |
| Azithromycin given | 0 |
| Dexamethasone given | 0 |
| Dobutamine given | 0 |
| Dopamine given | 0 |
| Eculizumab given | 0 |
| Enoxaparin given | 0 |
| Epinephrine given | 0 |
| Famotidine given | 0 |
| Gimisilumab given | 0 |
| Heparin given | 0 |
| Hydrocortisone given | 0 |
| Hydroxychloroquine given | 0 |
| Methotrexate given | 0 |
| Methylprednisolone given | 0 |
| Milrinone given | 0 |
| Norepinephrine Levophed given | 0 |
| No Ppm given | 0 |
| Phenylephrine given | 0 |
| Prednisone given | 0 |
| Remdesivir given | 0 |
| Rituximab given | 0 |
| Rivaroxaban given | 0 |
| Sarilumab given | 0 |
| Tissue Plasminogen Activator given | 0 |
| Tocilizumab given | 0 |
| Vasopressin Vasostrict given | 0 |
| Warfarin Coumadin given | 0 |
| SOFA Score | 2 |
| Weight (kg) | 1.75 |

**Table 7.** Clusters of patients with percent of severe patients per cluster and cluster biomarker observations. Clusters were generated through K-Means clustering where optimal number of clusters were determined through the Elbow Method. The data used as the input for clustering was SHAP values (feature impact scores) for the overall clinical feature set.

| **Cluster** | **Percent Severe (%)** | **Observations** |
| --- | --- | --- |
| **1** | **89.3** | - Patients with higher weight |
| **2** | **10.9** | - Patients with lower weight |
| **3** | **94.6** | - Patients with high SOFA score, BUN, and Serum Creatinine levels |
| **4** | **7.3** | - Patients with low SOFA score, BUN, and Serum Creatinine levels |
| **5** | **93.1** | - No real indicator - Interesting group of patients |
| **6** | **4.9** | - Patients with high BUN, Serum Creatinine, LDH - Low PCO2 arterial |
| **7** | **6.2** | - Patients with low values overall |
| **8** | **93.4** | - Patients with high LDH |
| **9** | **92.8** | - Patients with high potassium |
| **10** | **1.7** | - Patients with high lymphocyte percent |
| **11** | **95.1** | - Patients with high SOFA score, BUN, and Serum Creatinine levels |
| **12** | **96.5** | - Low BUN, Serum Creatinine - High CO2 total |
| **13** | **98.6** | - High SOFA score, BUN - Low Albumin - Normal Serum Creatinine |
| **14** | **11.1** | - Low PCO2 Arterial - Low SOFA score |
| **15** | **96.0** | - Normal SOFA score - High BUN |

**Table 8.** Results for predicting COVID severity in comorbidity specific patients trained on non-comorbidity patient data.

|  |  | **Trained on data without specific comorbidity** | | **Trained on data without any comorbidity** | |
| --- | --- | --- | --- | --- | --- |
| **Comorbidity** | **Percentage of overall data** | **Balanced Accuracy** | **ROC-AUC** | **Balanced Accuracy** | **ROC-AUC** |
| Alcoholic Nonalcoholic Liver Disease | 3.56% | 88.95% | 95.21% | 81.92% | 92.60% |
| Asthma | 5.9% | 78.23% | 87.22% | 76.44% | 83.21% |
| Atrial Fibrillation | 10.86% | 79.05% | 87.57% | 75.73% | 84.34% |
| Cancer Flag | 8.3% | 79.43% | 86.80% | 72.29% | 82.24% |
| Chronic Kidney Disease | 12.61% | 78.09% | 86.58% | 72.73% | 84.59% |
| Chronic Viral Hepatitis | 1.1% | 92.48% | 98.35% | 91.21% | 97.05% |
| Copd | 7.29% | 84.33% | 90.09% | 79.13% | 84.20% |
| Coronary Artery Disease | 13.93% | 83.93% | 91.92% | 82.35% | 90.79% |
| Crohns Disease | 8.82% | 72.66% | 79.69% | 82.81% | 91.80% |
| Diabetes | 29.8% | 79.70% | 89.65% | 75.97% | 86.56% |
| Heart Failure | 10.9% | 76.81% | 84.15% | 73.68% | 80.73% |
| Htn | 38.45% | 77.65% | 86.70% | 75.89% | 84.58% |
| Obstructive Sleep Apnea | 6.1% | 77.90% | 85.65% | 67.98% | 78.36% |
| Ulcerative Colitis | 0.31% | 100.00% | 100.00% | 100.00% | 100.00% |

**Table 9.** Common significant genes ( at GS>0.3 & MM>0.8) in MEcyan module across traits - EOD, SOFA, BUN

| CSL1 | DYSF | LRRC4 | RN7SL731P |
| --- | --- | --- | --- |
| ACTN1 | EXOC6 | MANSC1 | RNF24 |
| ADAM9 | F5 | MAP2K6 | RNU7-45P |
| ADGRG3 | FAM53C | MAPK14 | ROPN1L |
| ALOX5 | FCAR | MCTP2 | RPL11P3 |
| ALPK1 | FGR | MEGF9 | RPL26P5 |
| ANO10 | FLOT1 | MGAM | RPS2P14 |
| ANXA3 | FLOT2 | MIR3605 | RTEL1P1 |
| ATP11A | GCA | MIR4802 | SEMA4A |
| ATXN1 | GLT1D1 | MIR7848 | SIPA1L2 |
| B4GALT5 | HRH2 | MKNK1 | SIRPA |
| BASP1 | HYCC2 | MTCO3P23 | SLC22A4 |
| BASP1-AS1 | IL17RA | MTCYBP23 | SLC25A44 |
| BAZ1A | ITGAM | MTMR3 | SLC2A3 |
| BCL6 | JAK3 | MTND3P12 | SLC37A3 |
| C3orf86P | KIF1B | MTND4LP23 | SLC9A8 |
| CAMKK2 | KLHL2 | MTND5P32 | SLED1 |
| CARD6 | LILRA6 | NABP1 | SRPK1 |
| CFLAR | LILRB3 | NEAT1 | SSH1 |
| CR1 | LRG1 | NQO2 | STAT5B |
| CRISPLD2 | PIK3CD-AS1 | PFKFB3 | STX11 |
| DRAM1 | PLXNC1 | PGS1 | STX3 |
| RALB | PPP1R3D | PHF21A | TGFA |
| RASGRP4 | PRKCD | PHTF1 | TLR5 |
| RN7SL552P | PYGL | UPP1 | TLR8 |
| WDFY3 | TRIM25 | USB1 | TMCO3 |
| XPO6 | UBXN2B | ZNF415P1 |  |

**Table 10.** Common significant genes ( at GS>0.2 & MM>0.8)in MEdarkred module across traits - EOD, SOFA, BUN, and heart failure, alcohol liver disease, kidney disease selected ( at GS>0.1 & MM>0.8, since these set are only moderately significant)

| ACSL1 | LOT1 | MTCYBP23 | SEMA4A |
| --- | --- | --- | --- |
| ACTN1 | FLOT2 | MTMR3 | SIPA1L2 |
| ADAM9 | GCA | MTND3P12 | SIRPA |
| ADGRG3 | GLT1D1 | MTND4LP23 | SLC22A4 |
| ALOX5 | HRH2 | MTND5P32 | SLC25A44 |
| ALPK1 | HYCC2 | NABP1 | SLC2A3 |
| ANO10 | IL17RA | NEAT1 | SLC37A3 |
| ANXA3 | ITGAM | NQO2 | SLC9A8 |
| ATP11A | JAK3 | FGR | SLED1 |
| ATXN1 | KIF1B | PFKFB3 | SRPK1 |
| B4GALT5 | KLHL2 | PGS1 | SSH1 |
| BASP1 | LILRA6 | PHF21A | STAT5B |
| BASP1-AS1 | LILRB3 | PHTF1 | STX11 |
| BAZ1A | LRG1 | PIK3CD-AS1 | STX3 |
| BCL6 | LRRC4 | PLXNC1 | TGFA |
| C3orf86P | MANSC1 | PPP1R3D | TLR5 |
| CAMKK2 | MAP2K6 | PRKCD | TLR8 |
| CARD6 | MAPK14 | PYGL | TMCO3 |
| CFLAR | MCTP2 | RALB | TRIM25 |
| CR1 | MEGF9 | RASGRP4 | UBXN2B |
| CRISPLD2 | MGAM | RN7SL552P | UPP1 |
| DRAM1 | MIR3605 | RN7SL731P | USB1 |
| DYSF | MIR4802 | RNF24 | WDFY3 |
| EXOC6 | MIR7848 | RNU7-45P | XPO6 |
| F5 | MKNK1 | ROPN1L | ZNF415P1 |
| FAM53C | MTCO3P23 | RPL11P3 | RPS2P14 |
| FCAR | TEL1P1 | RPL26P5 |  |

| 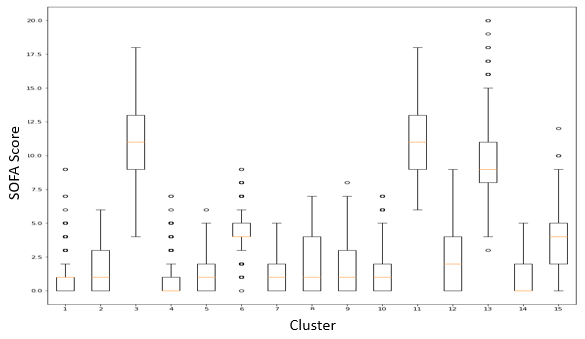 |
| --- |
| 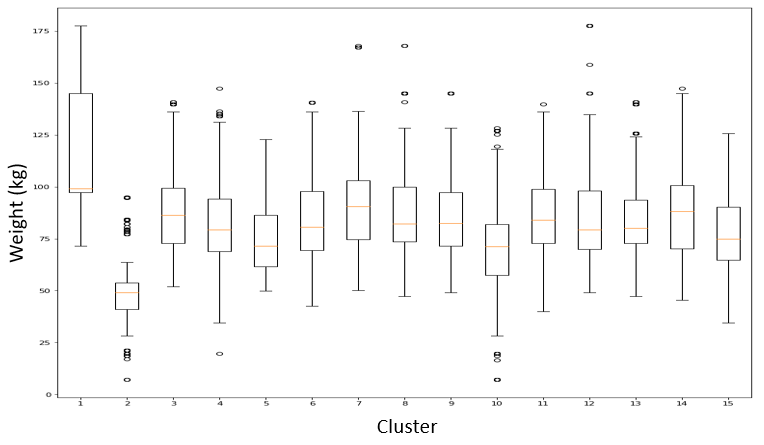 |
| 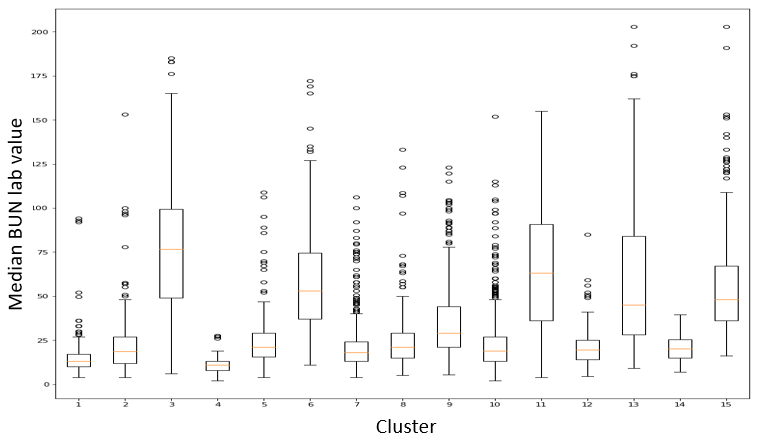 |
| 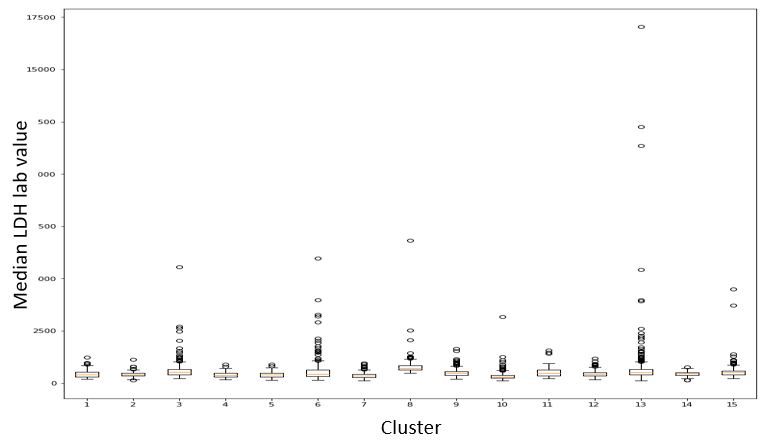 |
| 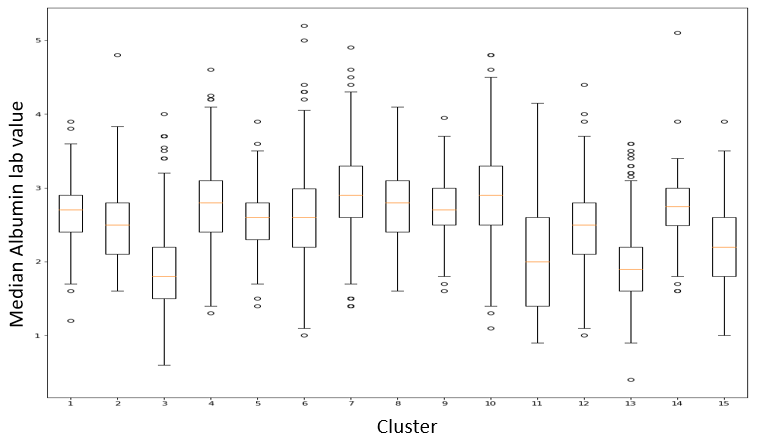 |
| 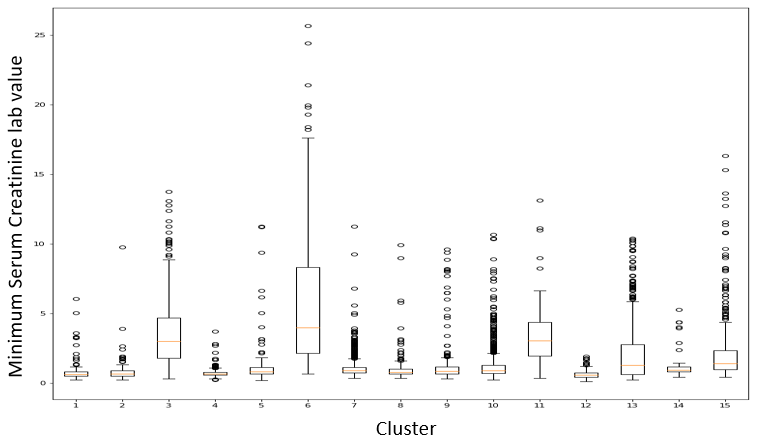 |
| 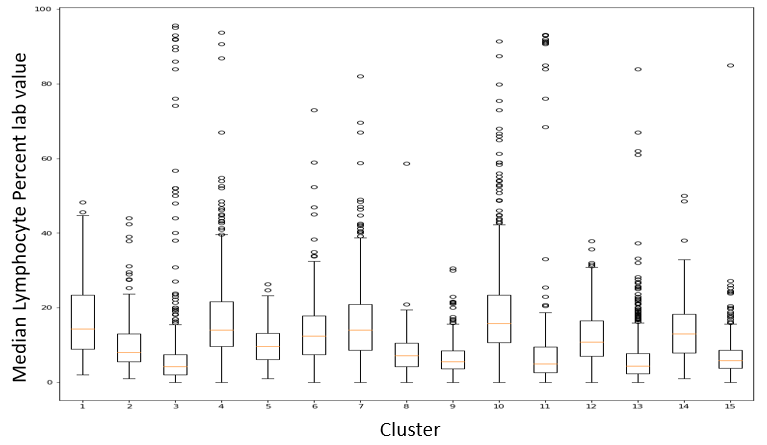 |
| 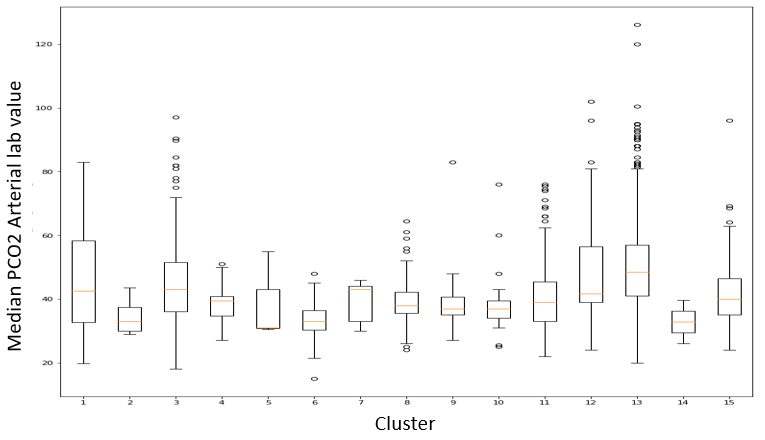 |

**Figure 1****.** Biomarker value boxplots per cluster. Varying biomarker value thresholds can be clearly correlated with percentage of severe patients for many of the clusters. Cluster 5 did not have a clearly observed correlation between biomarker values and percent of severe patients. Much of the clusters that had high percent of severe patients had distinct levels of BUN, Serum Creatinine, and SOFA score.


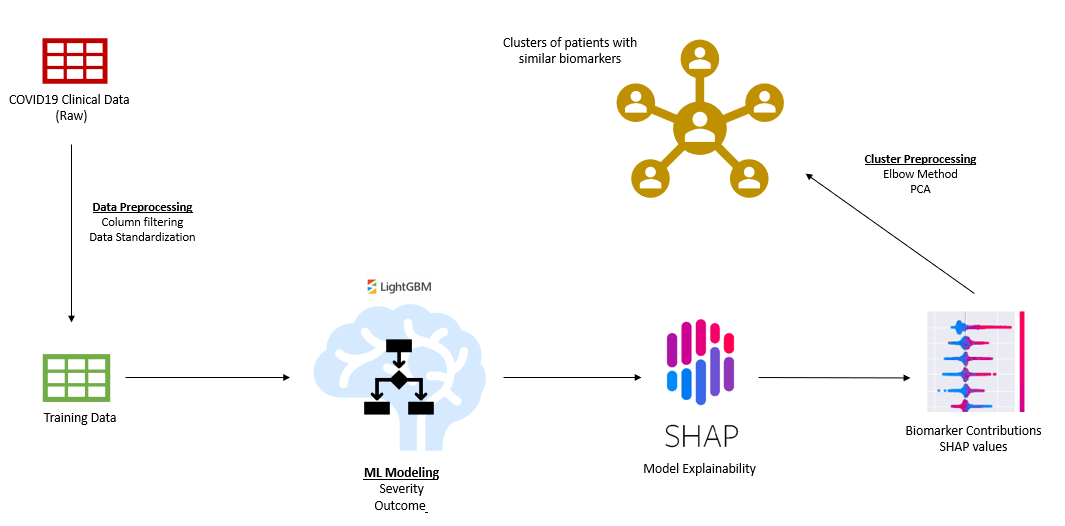


**Figure 2.** Clinical biomarker ML workflow

Raw Clinical Data

Data Cleaning

Clinical Biomarker Data

Data Preprocessing and Transformation

Model Training

Severity Classification Model

Model Explainability

Feature Impact Scores

Clustering

Patient Clusters

**Figure 3.** ML Clustering Methodology overview. Raw clinical data was cleaned and preprocessed to include relevant columns and appropriate value standardization. Clinical biomarker data was used in ML modeling for predicting COVID-19 case severity. Model explainability with SHAP was applied on the trained severity model and clinical biomarker data was transformed into feature impact scores, which was the input for clustering.


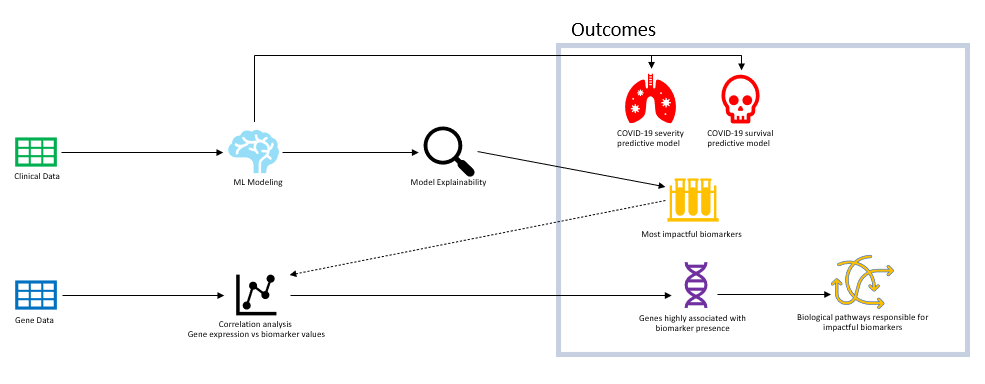


**Figure 4.** Overall Bioanalysis / ML workflow

**
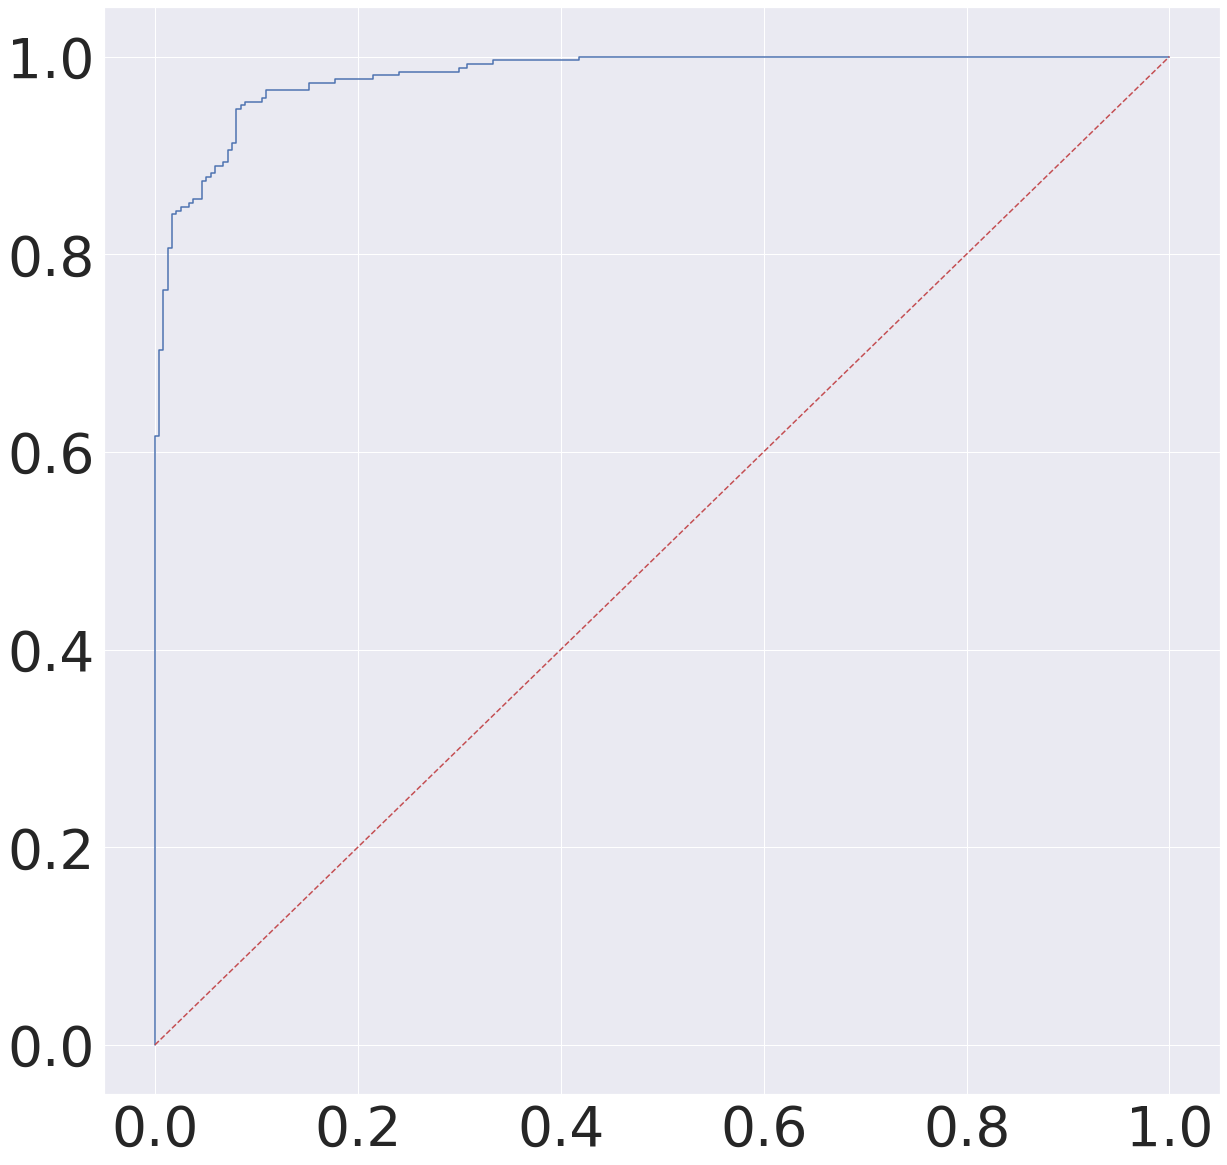
**

**Figure 4.** ROC curve for severity classification model (98.1%)

**
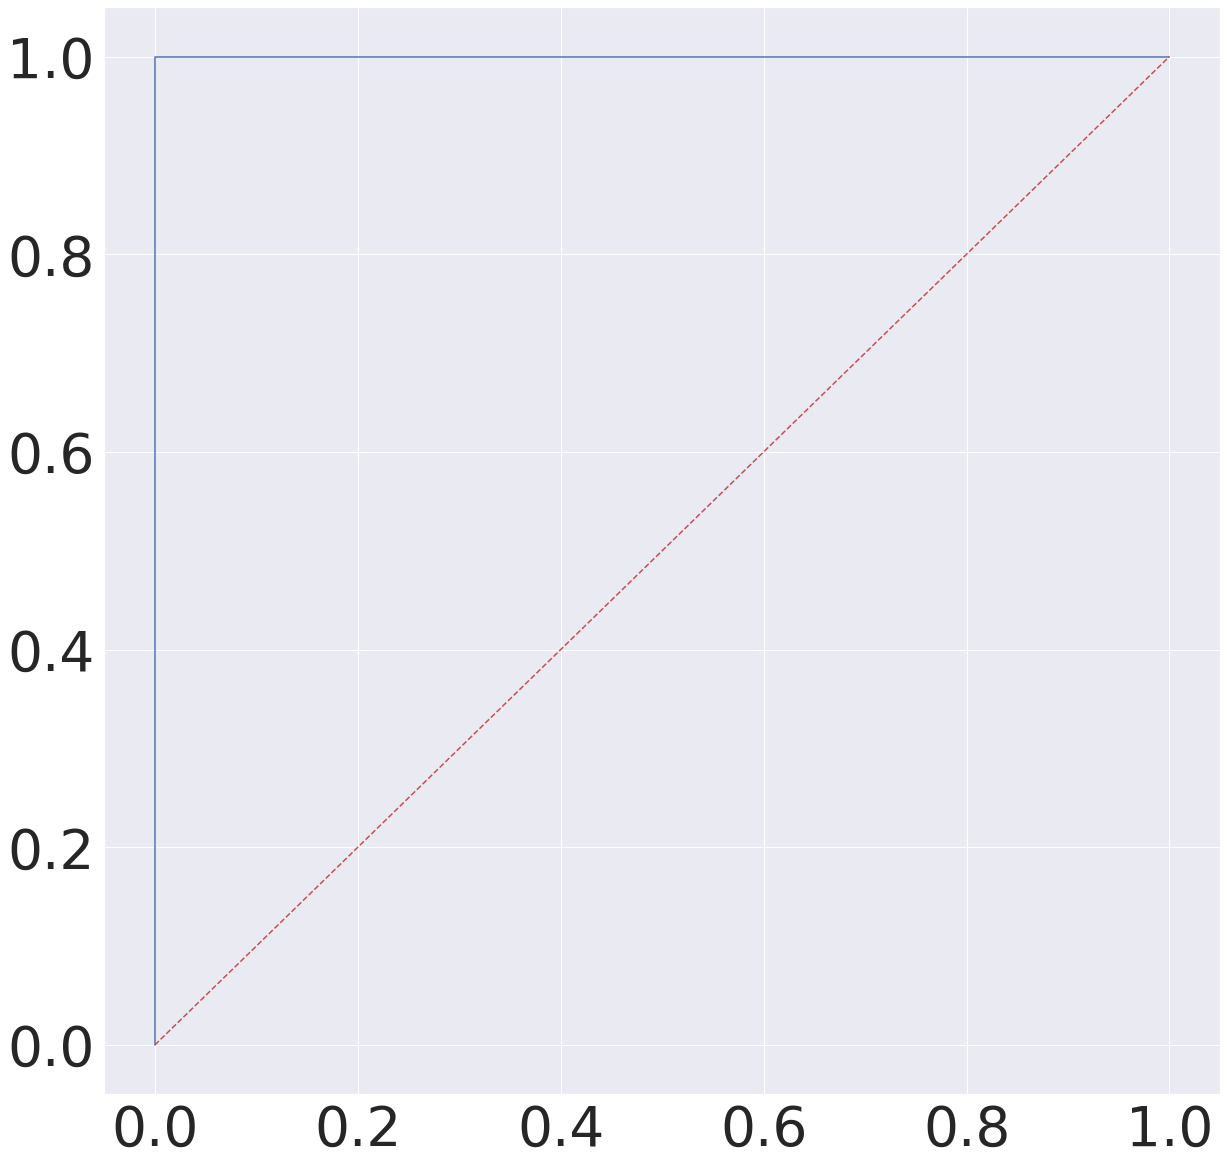
**

**Figure5.** ROC curve for outcome/survivability classification model (99.9%)

**
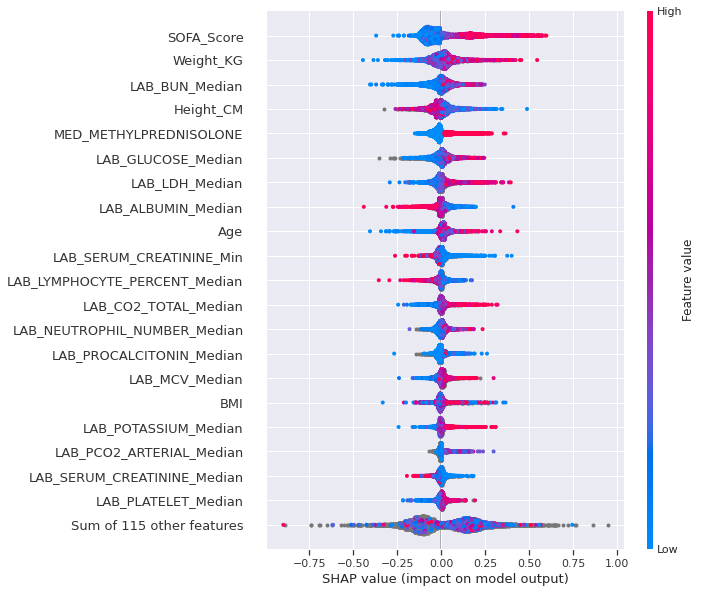
**

**Figure 6.**

**
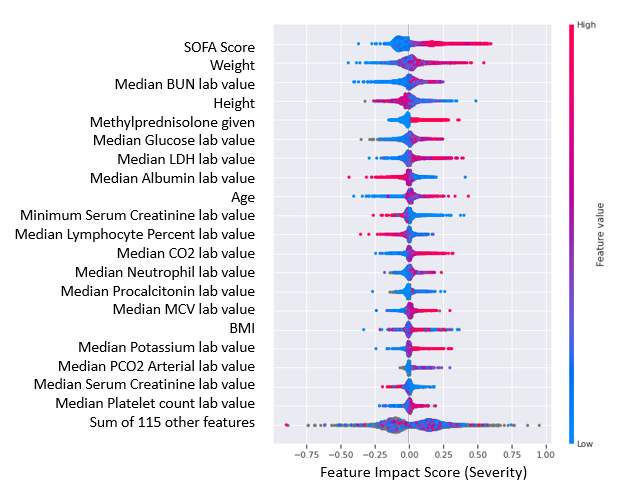
**

**Figure 7.** Top 20 clinical features for severe COVID cases

| **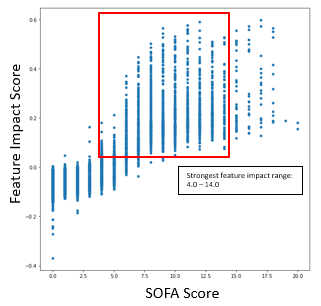** | **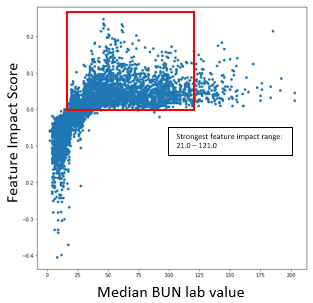** |
| --- | --- |
| **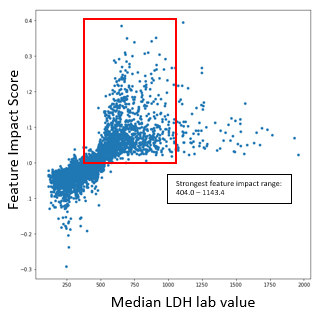** | **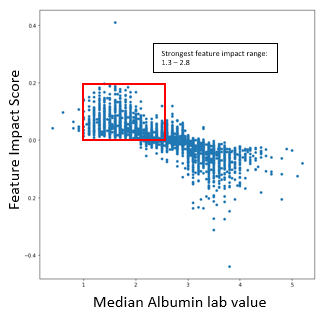** |
| **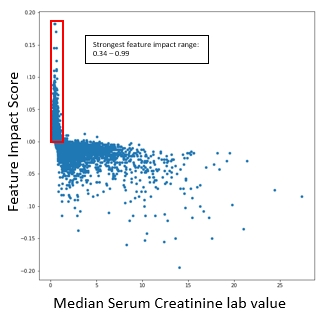** | **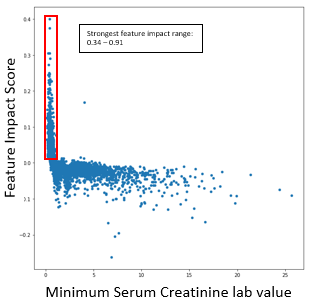** |

**Figure 8.** Biomarker value vs SHAP value scatter plots for Severity models.

SOFA Score severe range (normal distribution): 4 - 14

BUN median severe range (normal distribution): 21 -121

Glucose median severe range (normal distribution): 109 - 297

LDH median severe range (normal distribution): 404 - 1193

Albumin median severe range (normal distribution): 1.3 - 2.8

Serum Creatinine minimum severe range (normal distribution): 0.34 - 0.91

**
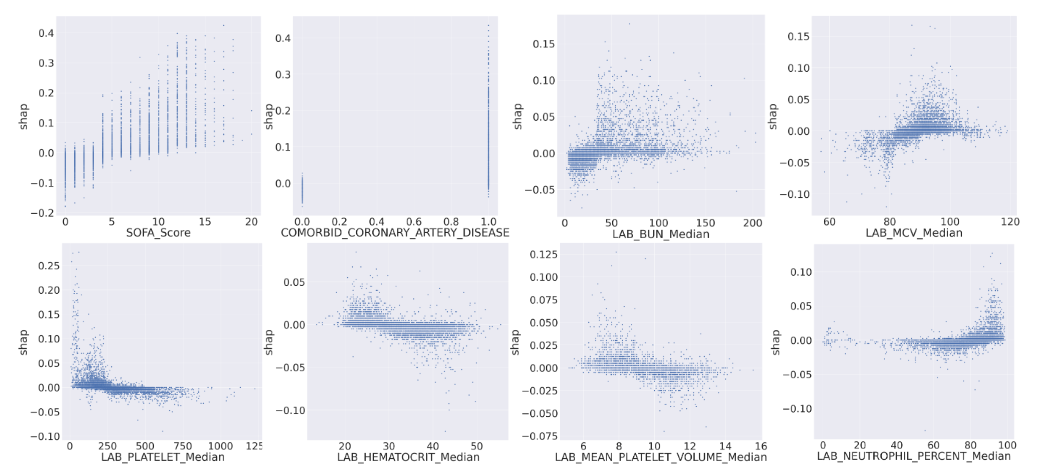
**

**Figure 9.** Biomarker value vs SHAP value scatter plots for Outcome models

**
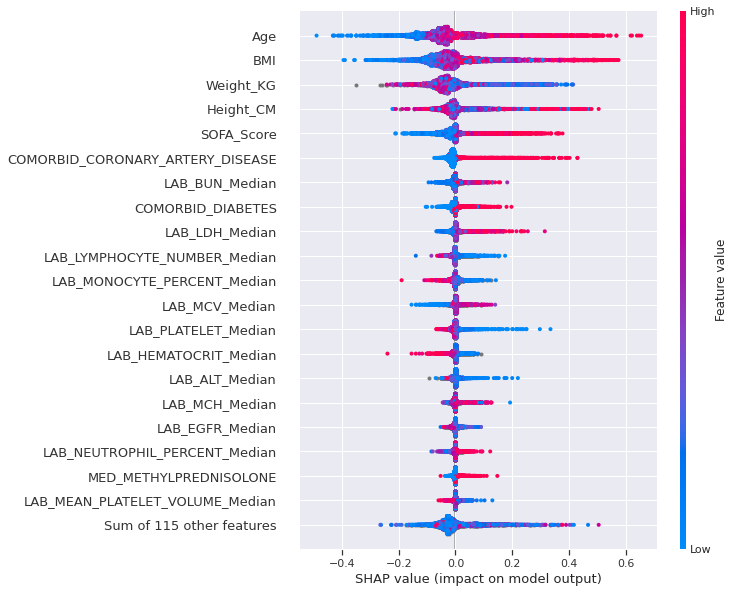
**

**
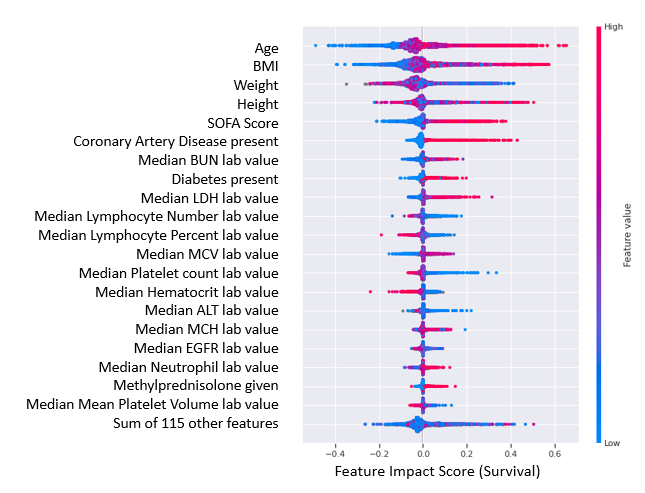
**

**Figure 10.** Top 20 clinical features for outcome/survivability model seen via SHAP value beeswarm

**
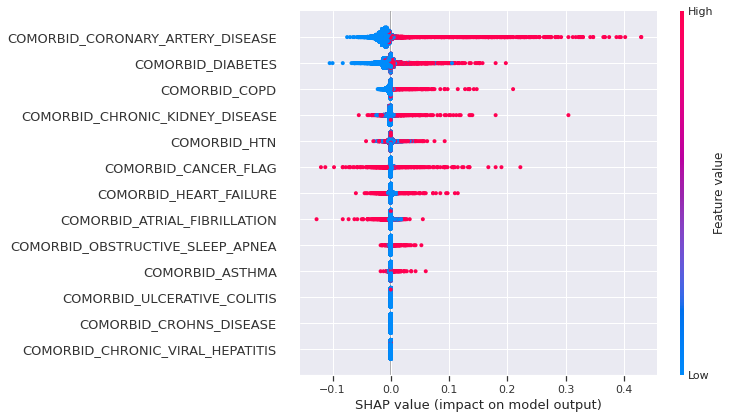
**

**Figure 11.** Comorbidity based inferences for outcome/survivability models seen via SHAP value beeswarm

**Note**

The bioinformatics analysis is to identify gene networks that show significant differences associated with COVID-19 severity, patient disease comorbidities, clinical biomarker measure during the patient stay in the clinic. The enrichment analysis is done on the significant gene network list using the GO ( biological processes) and KEGG pathway for gene annotation.


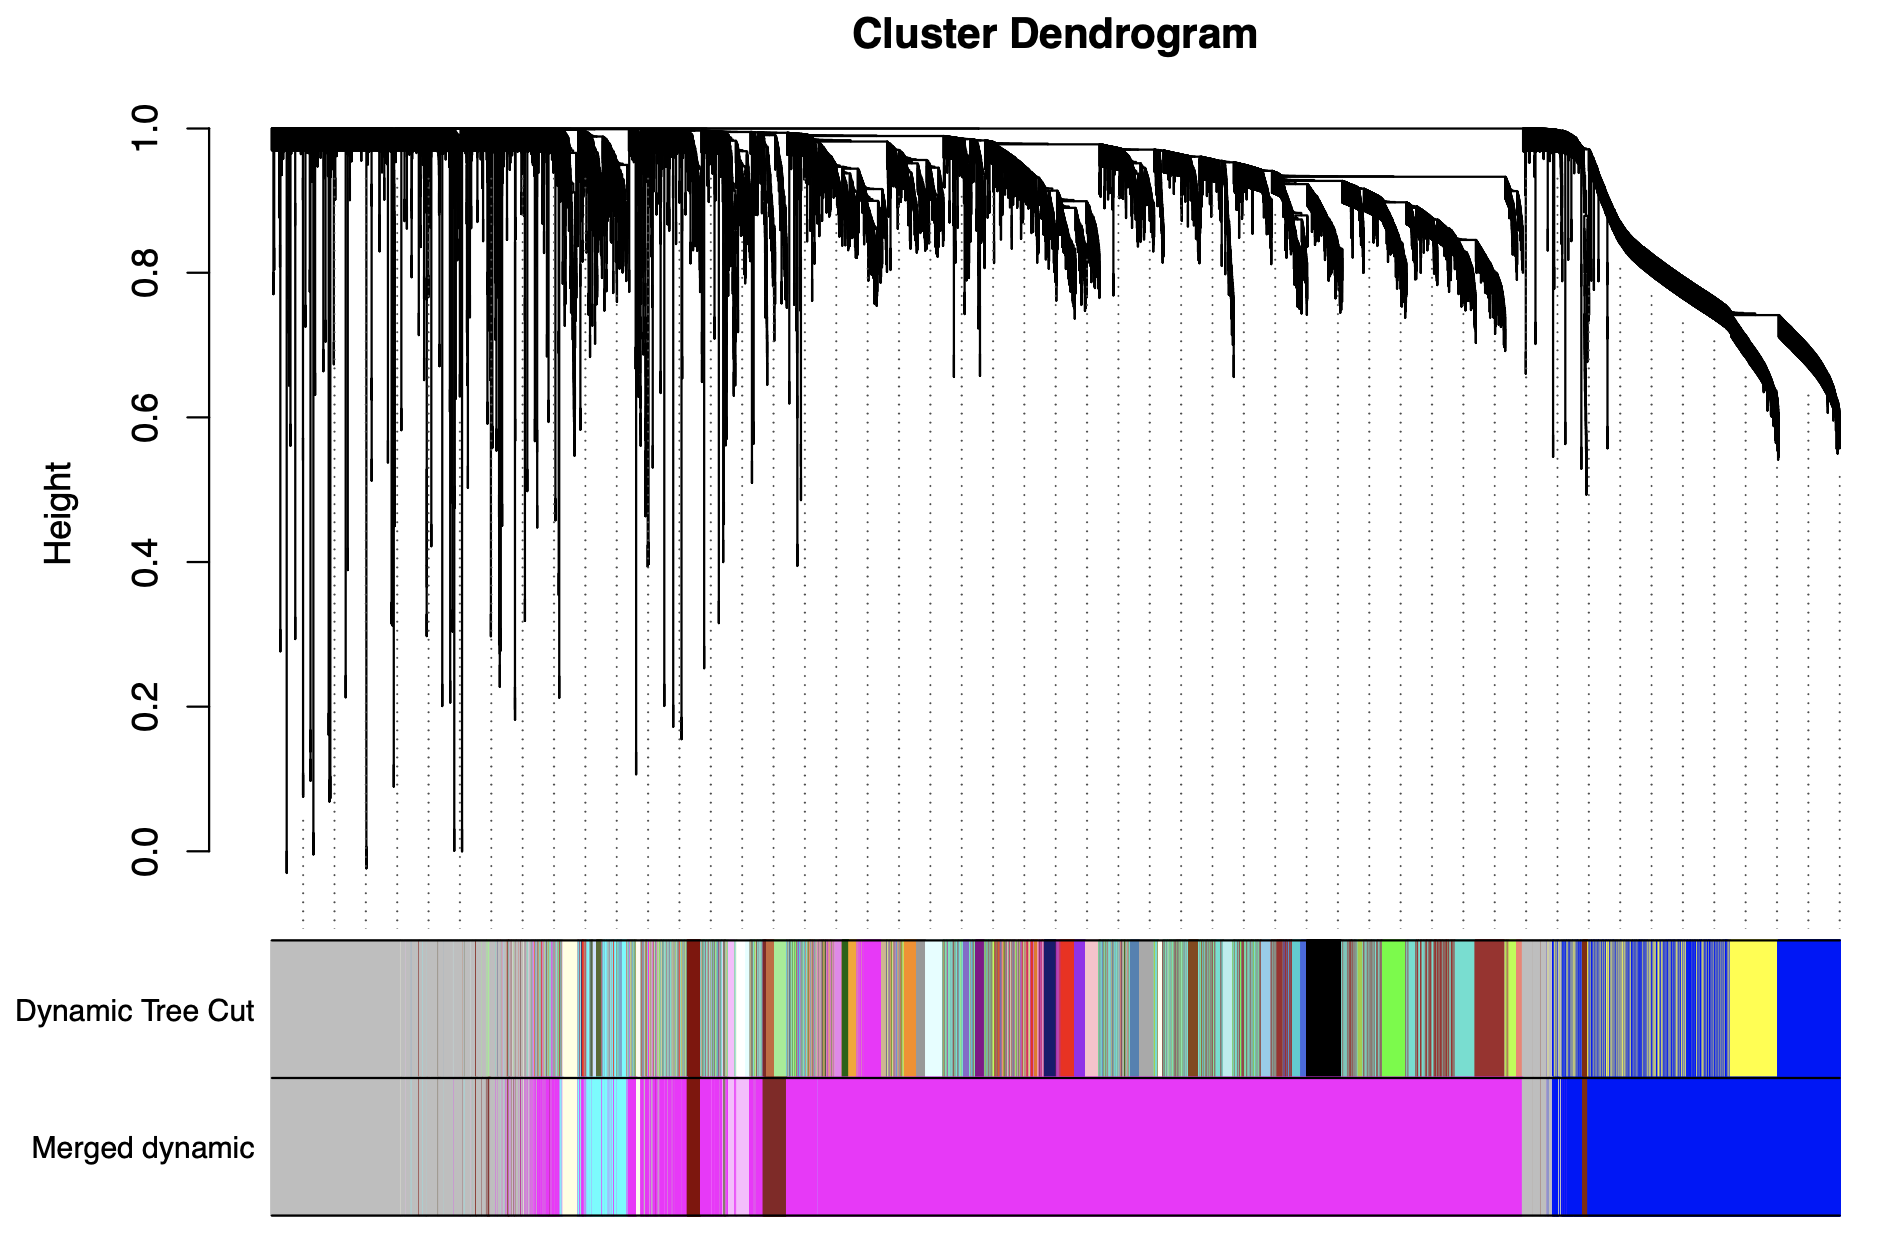


**Figure 12.** Gene Cluster Dendrogram for. The blocks in Dynamic Tree Cuts are different modules or clusters of gene network, and Merged dynamic blocks modules merged together based on module similarity from Dynamic Tree Cut blocks

**
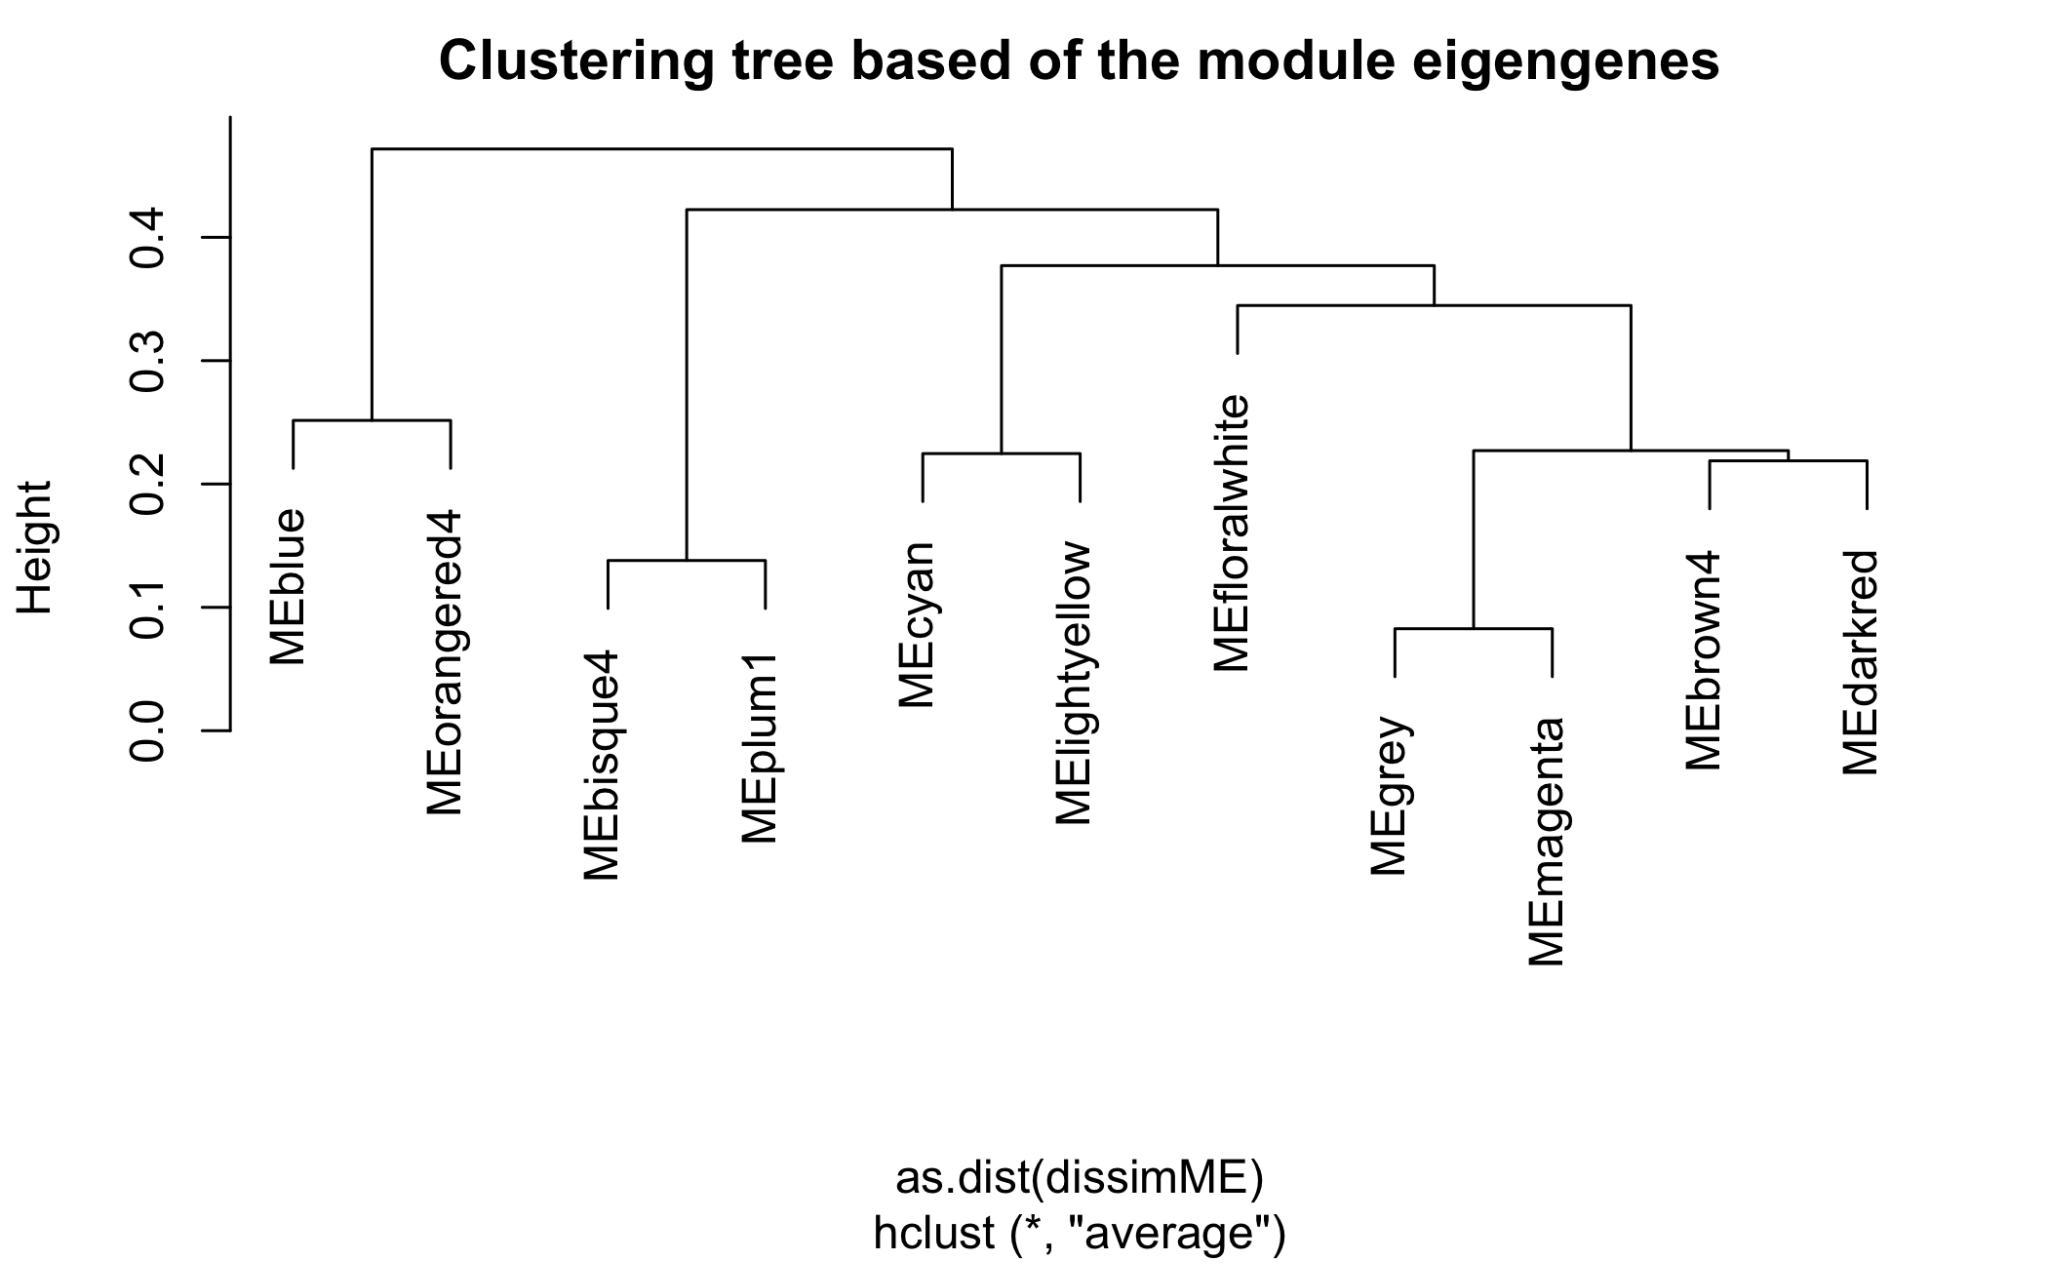
**

**Figure 13.** Cluster Tree of gene module eigengenes based on the merge dynamic blocks

**
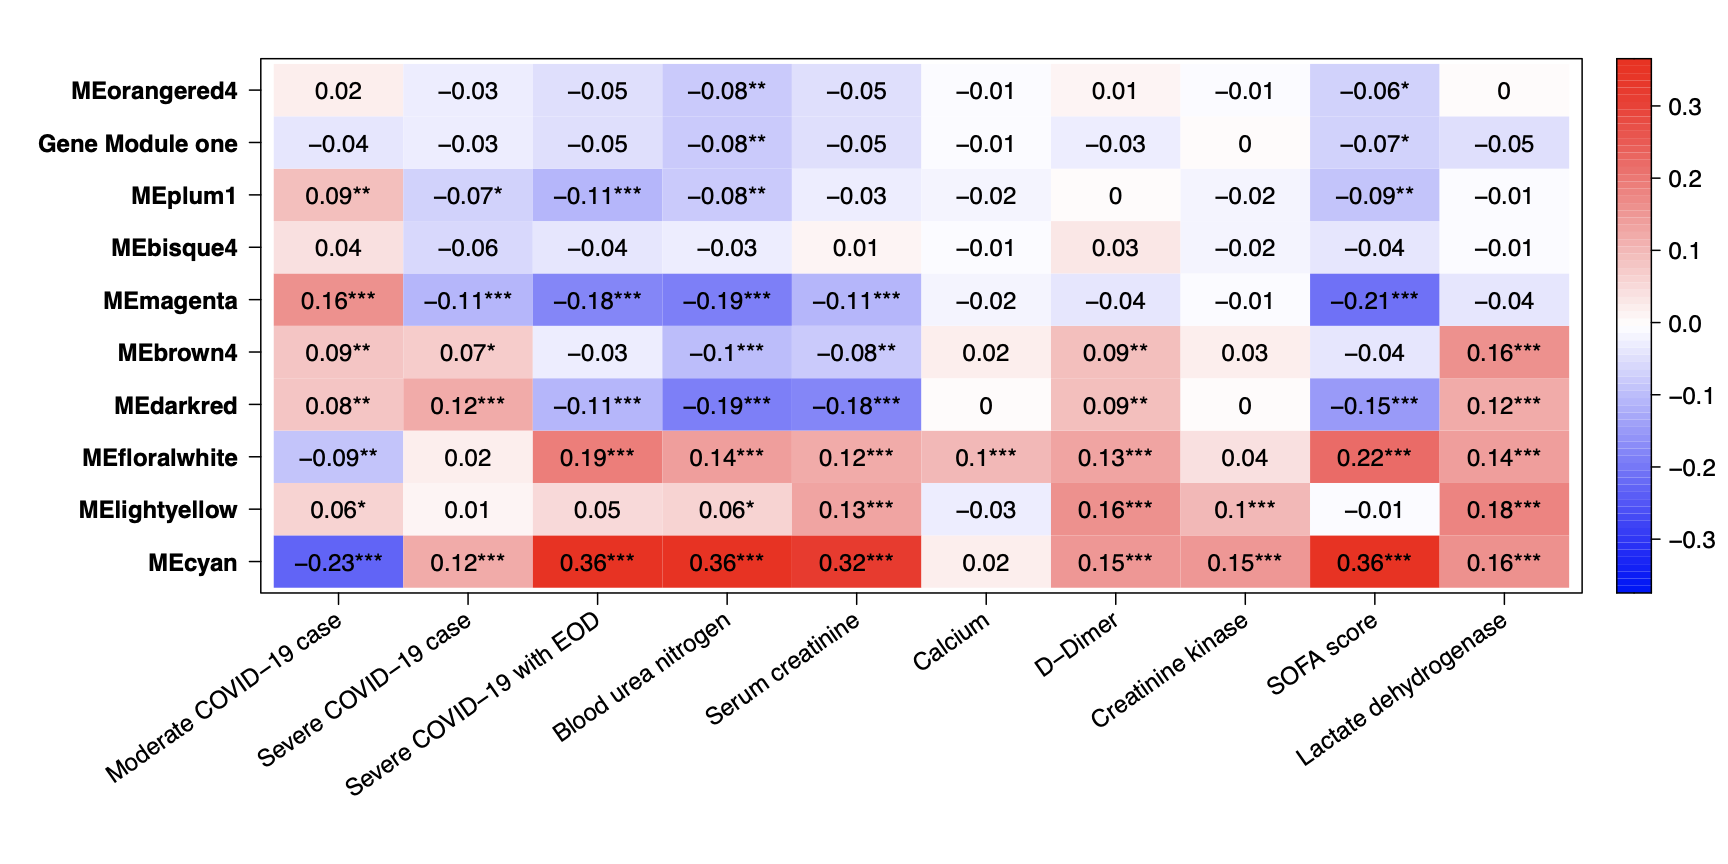
**

**Figure 14**. Heatmaps of module traits for severity and clinical biomarkers. The boxes indicate the correlation based on module eigengenes in the rows and traits in the column. The color legend – blue (negative correlation) and red (positive correlation) - and p-values represented by asterisk where (***) indication very significant.

**
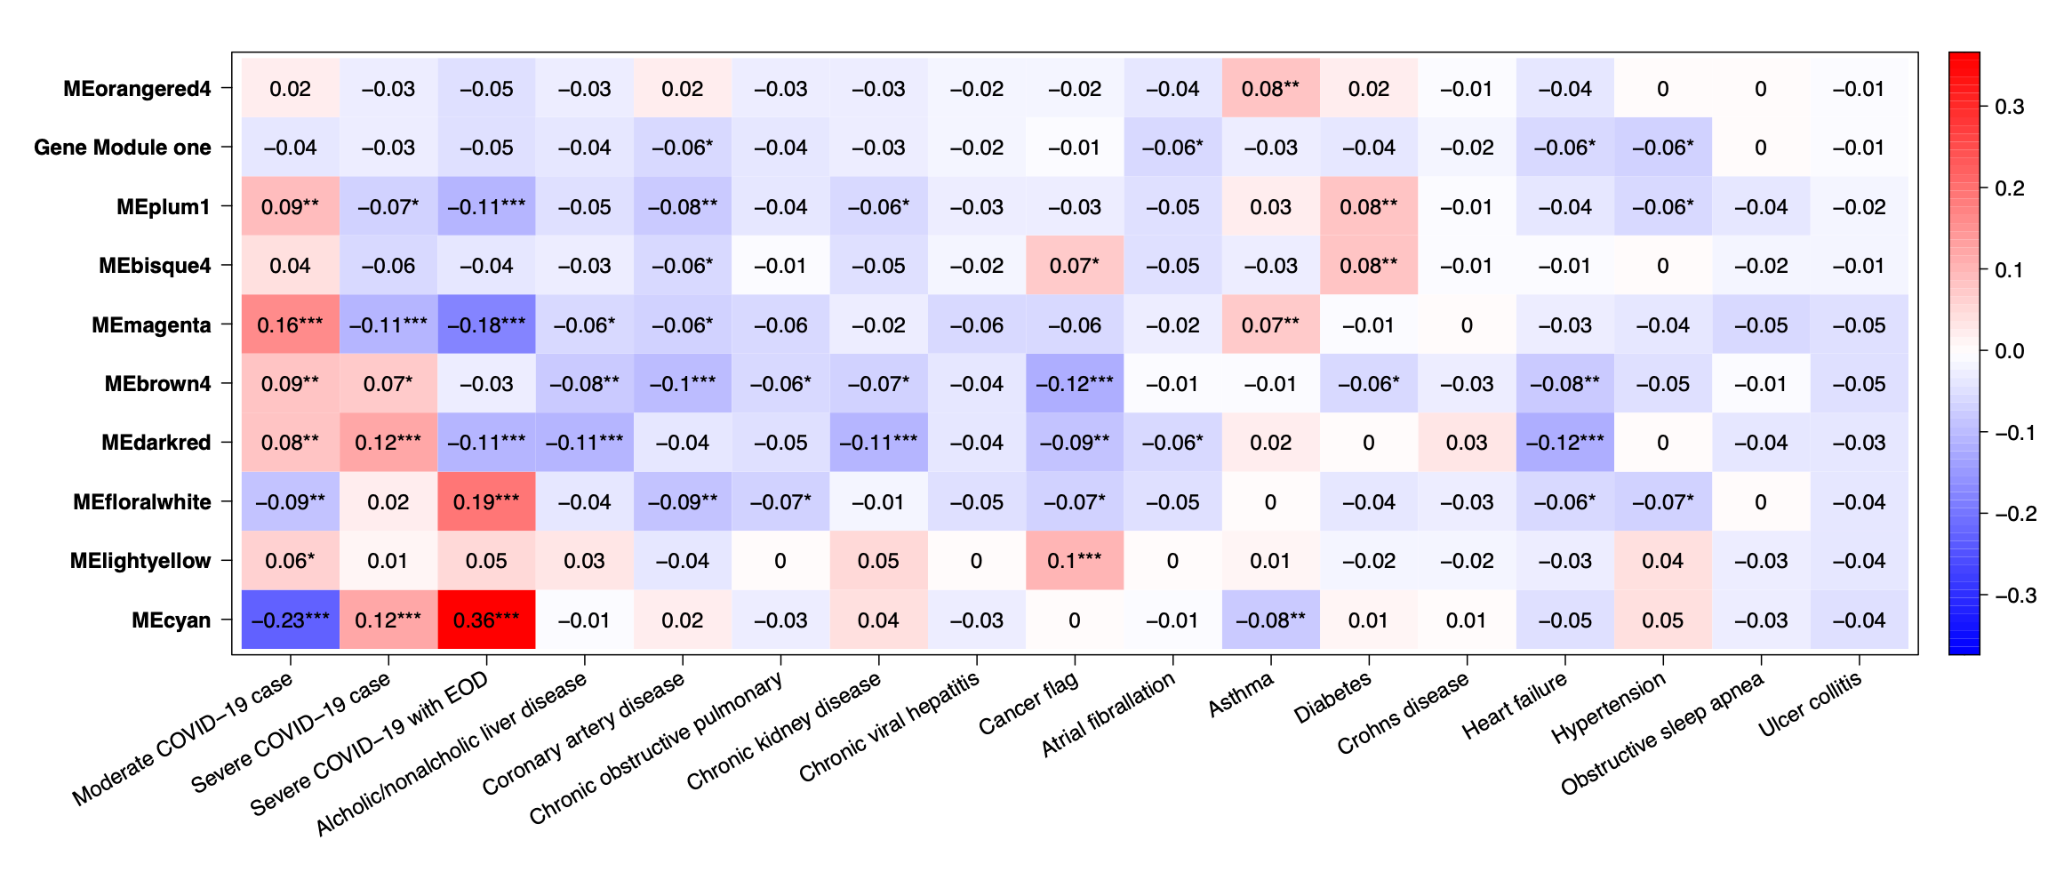
**

**Figure 15**. Heatmaps of module traits for severity and disease comorbidity. The boxes indicate the correlation based on module eigengenes in the rows and traits in the column. The color legend – blue (negative correlation) and red (positive correlation) - and p-values represented by asterisk where (***) indication very significant.

**
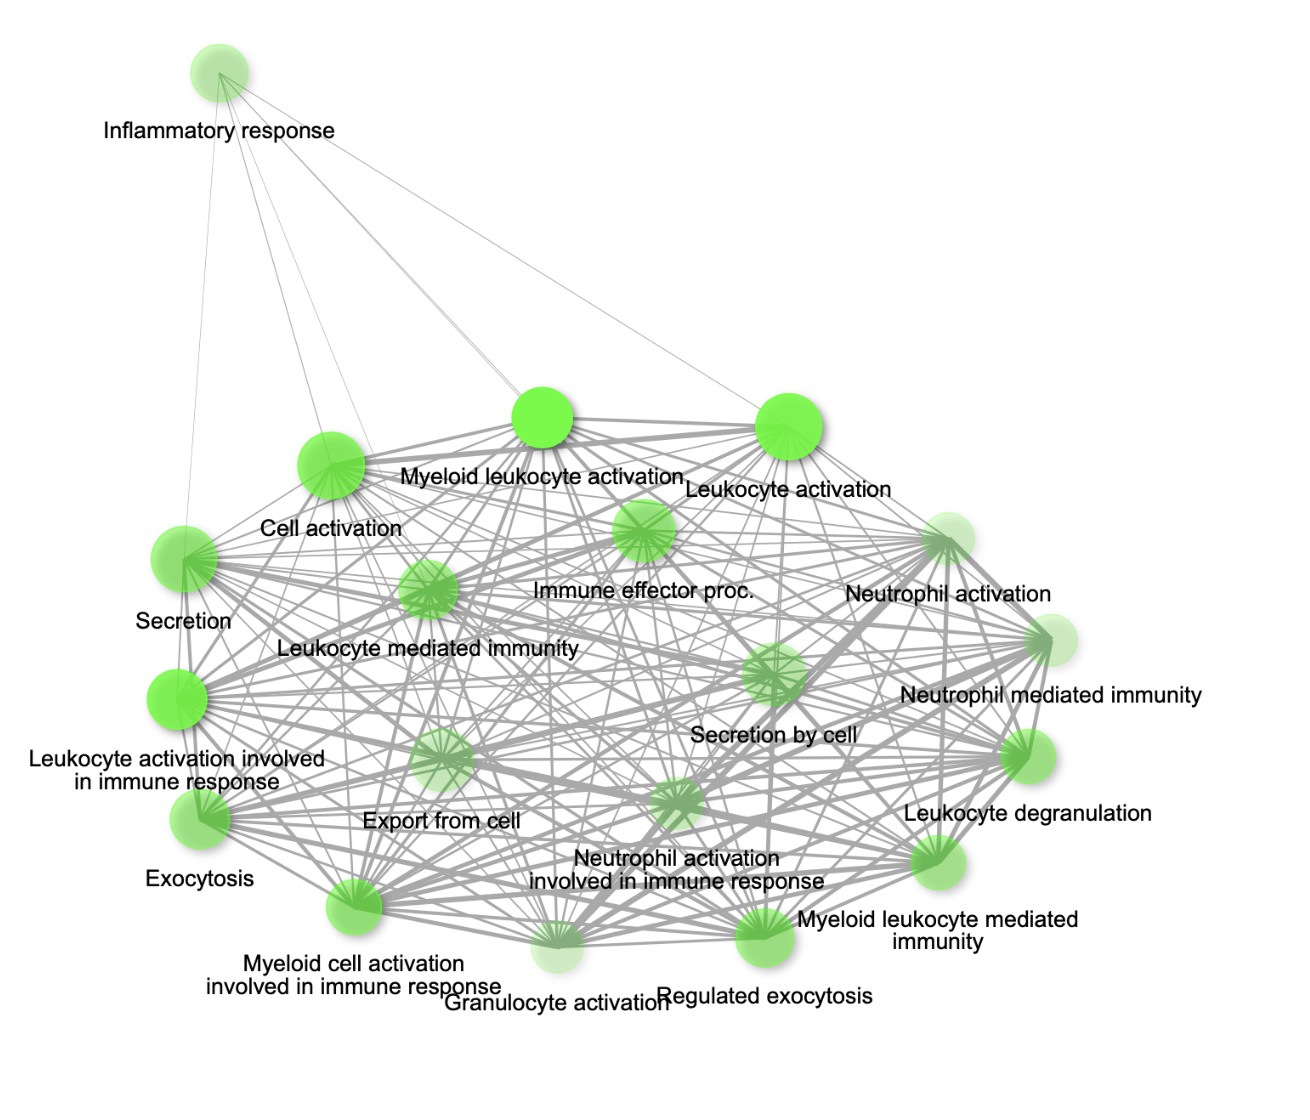
**

**Figure 16**. Gene network for top 20 enriched pathways for genes module, MEcyan based on GO biological process annotation.

**
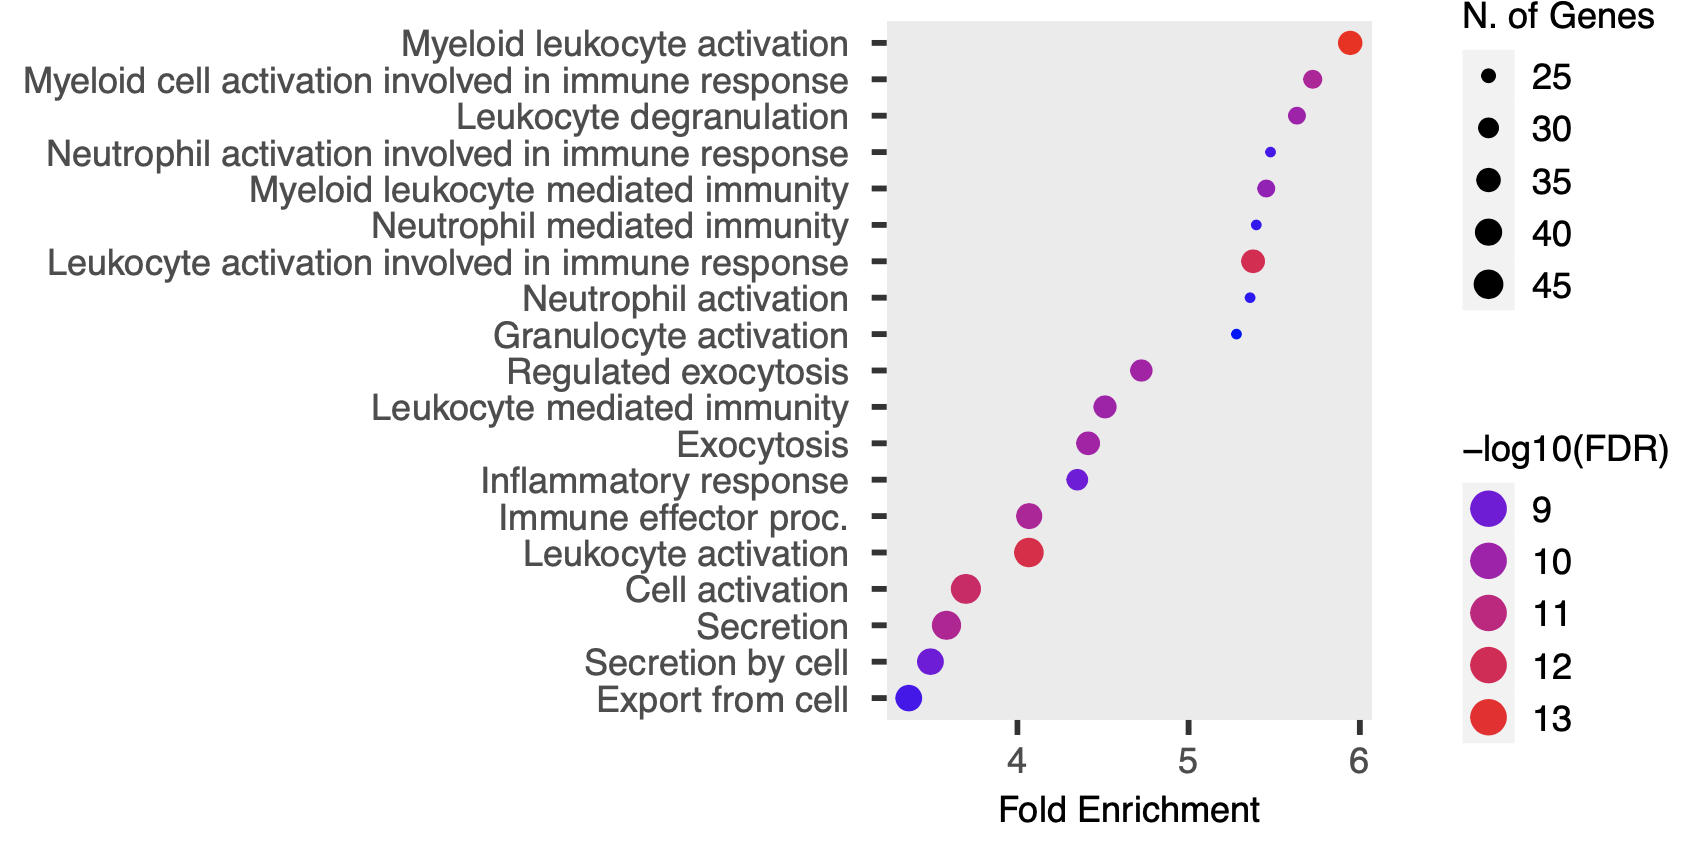
**

**Figure 17**. Dot plot for top 20 enriched pathways based for gene module, MEcyan based on GO annotation

**
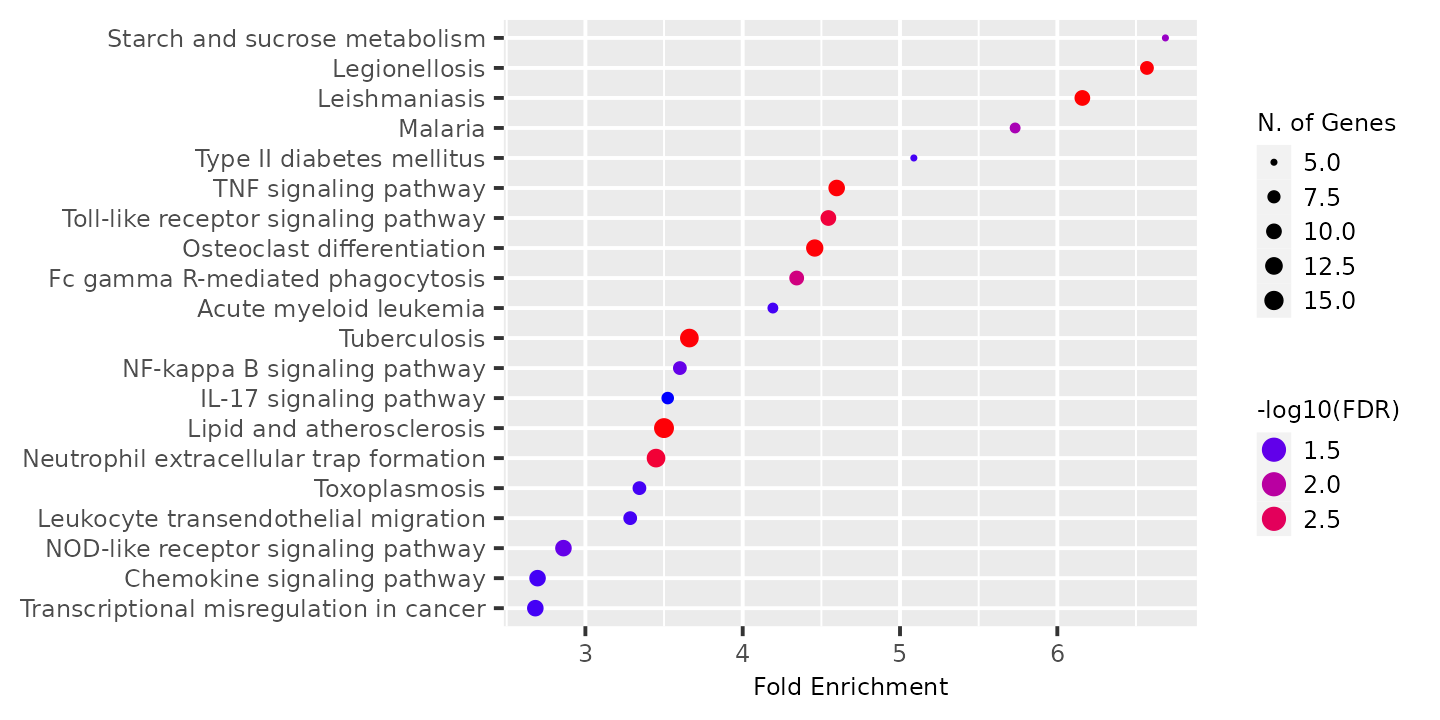
**

**Figure 18**. Dot plot for top 20 most enriched pathways based for gene module, MEcyan based on KEGG

**
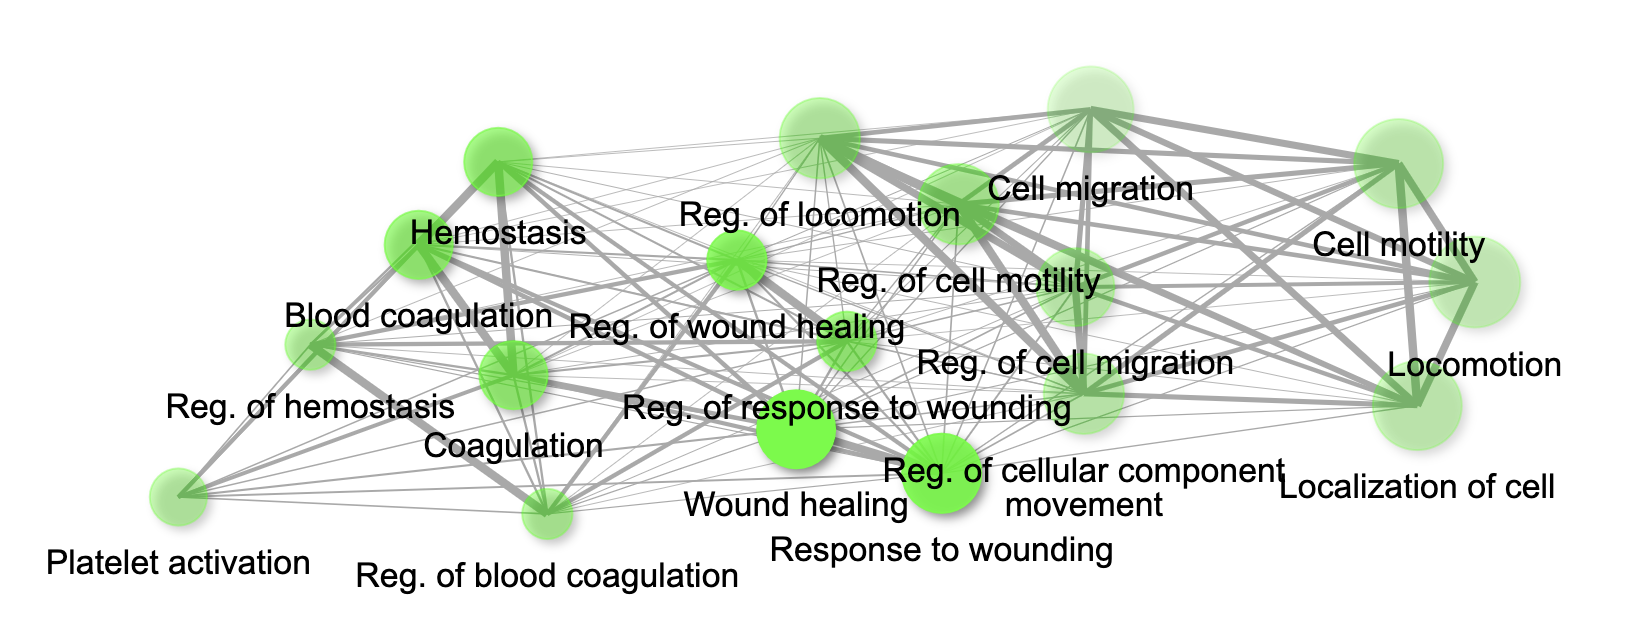
**

**Figure 19.** Gene network for top 20 enriched pathways for genes module, MEdarkred based on GO biological process annotation.

**
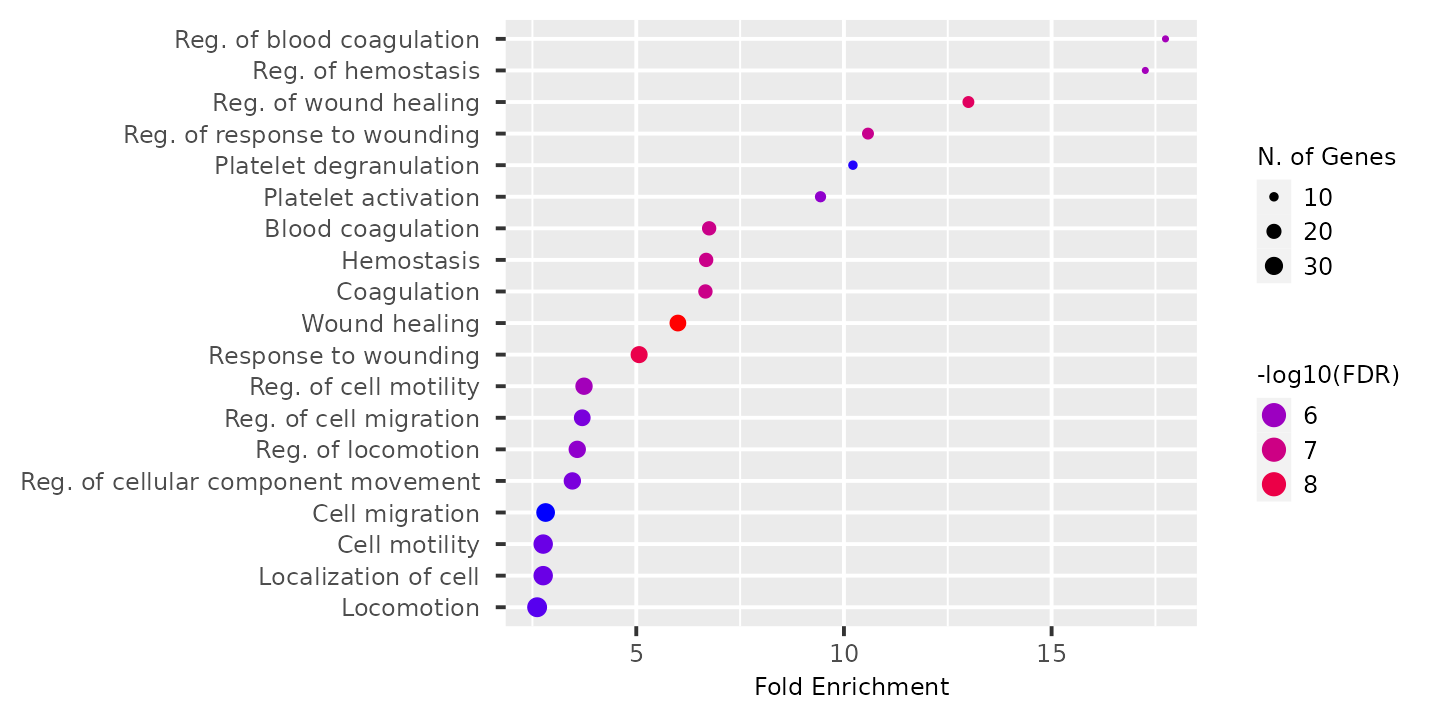
**

**Figure 20**. Dot plot for top 20 enriched pathways based for gene module, MEdarkred based on GO annotation

**
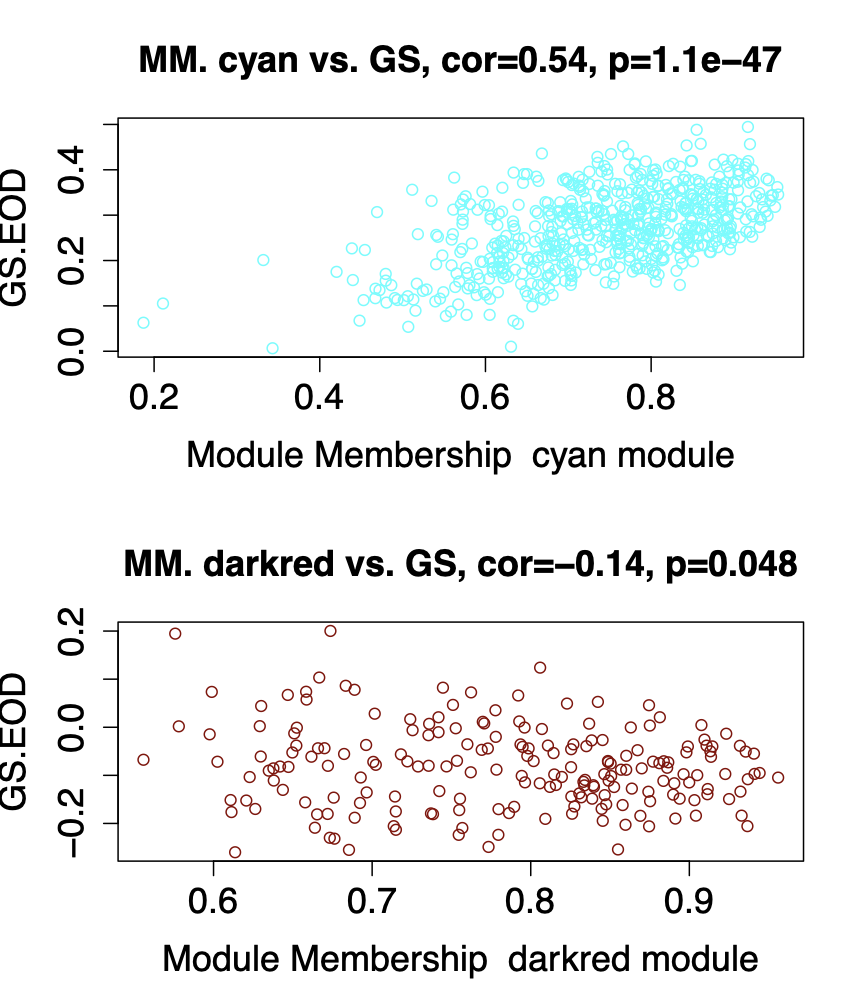

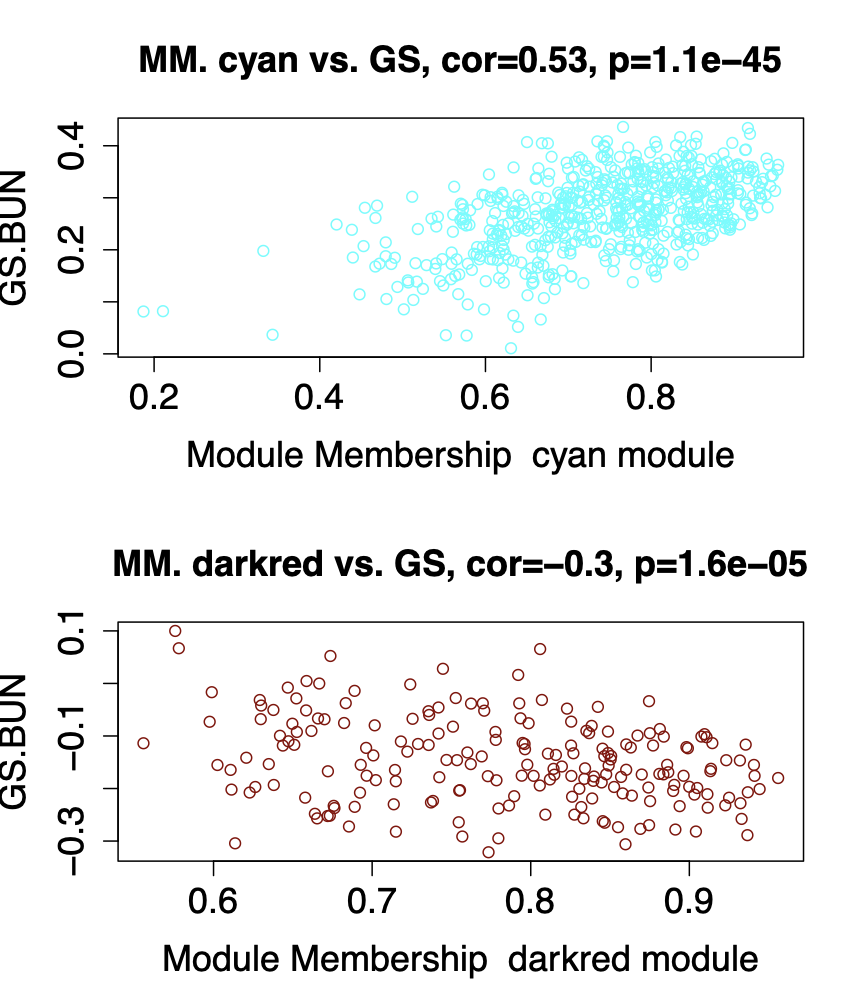
**

**
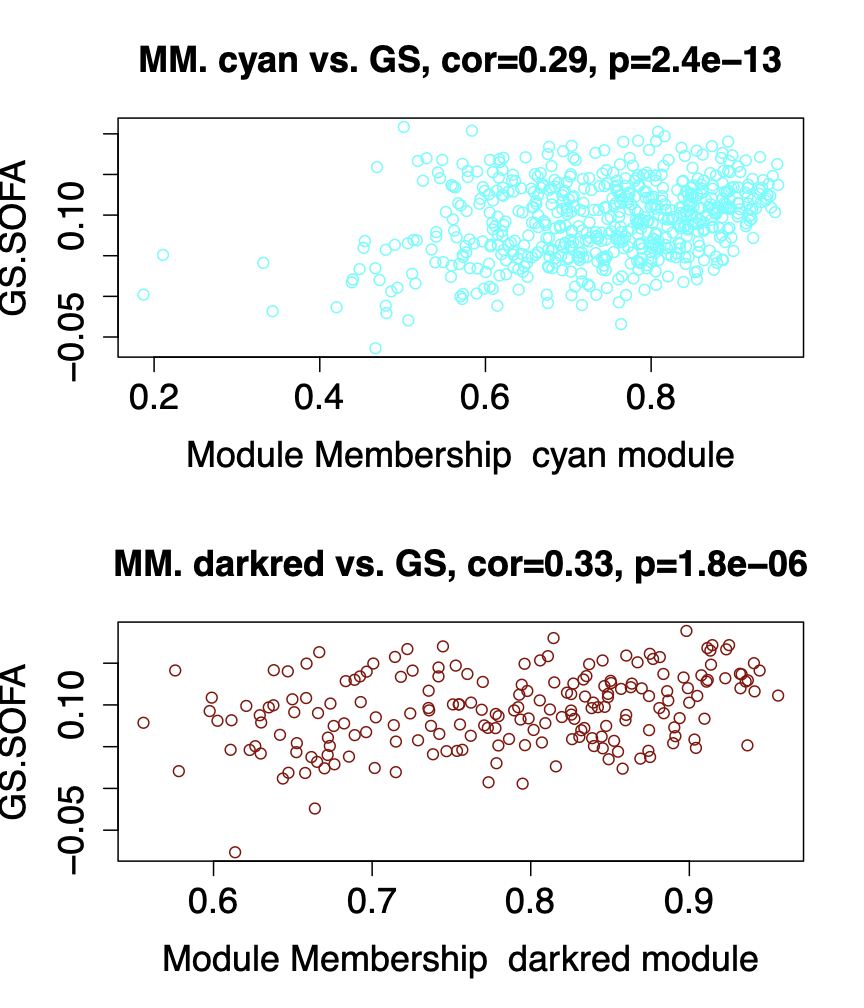

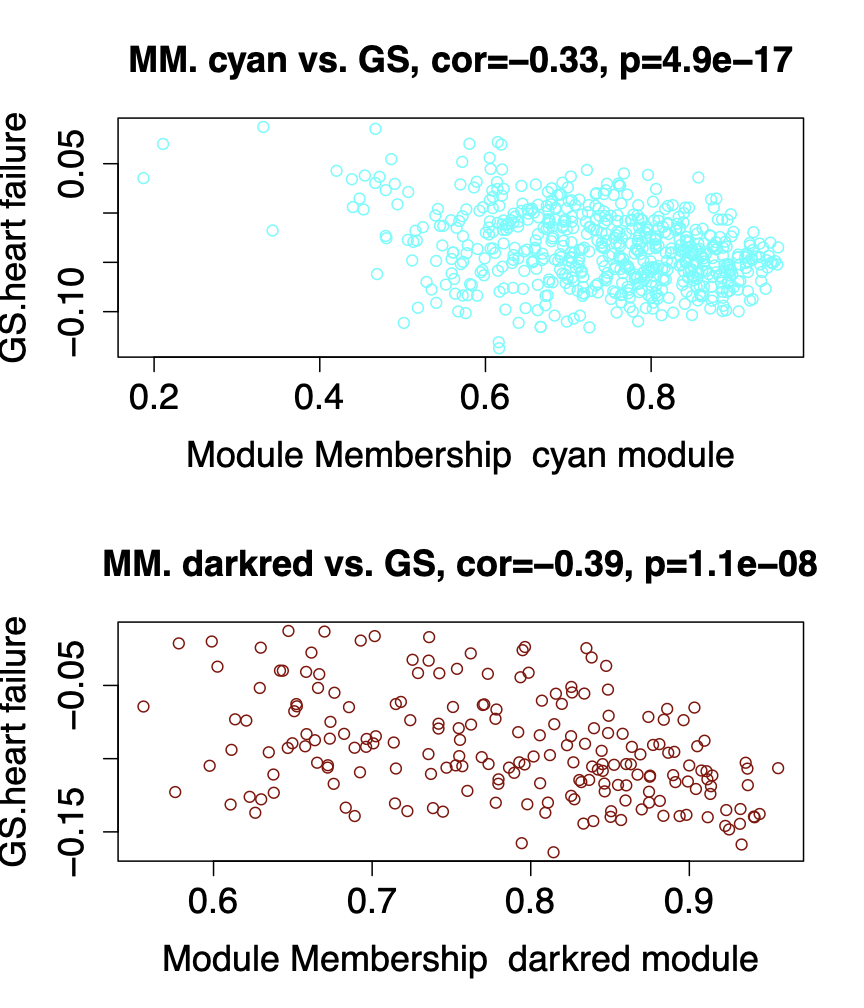
**

**
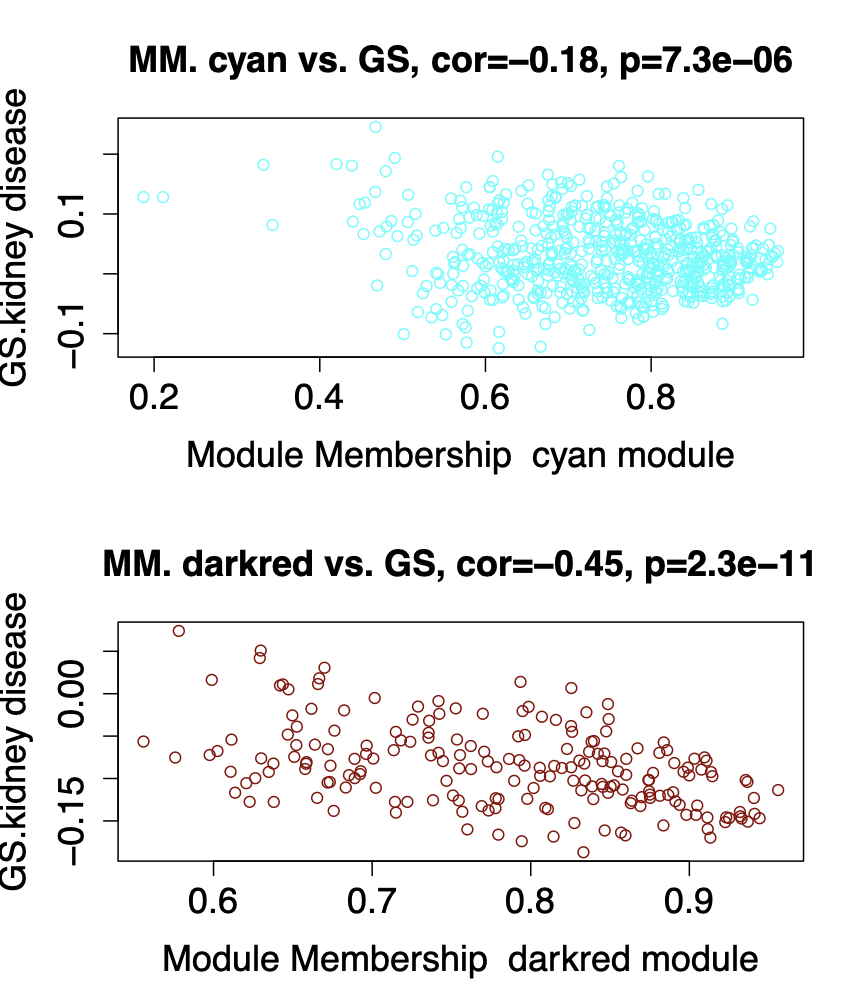

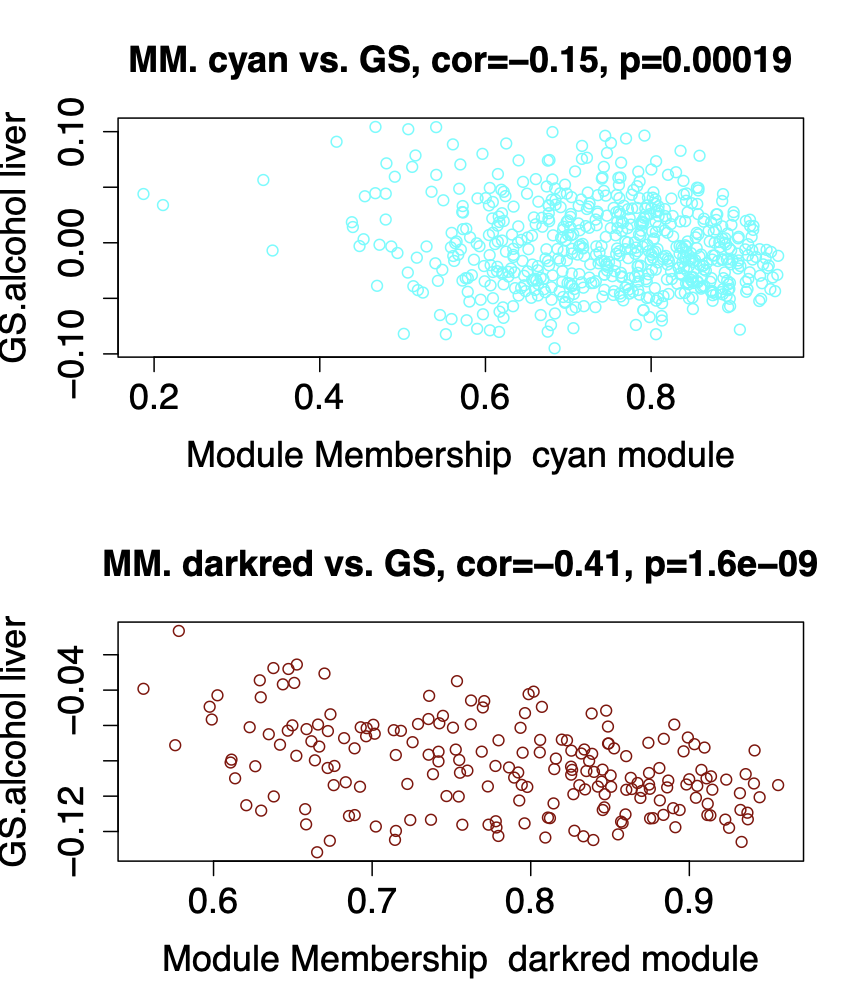
**

**Figure 21.** Scatterplots of gene significance for EOD, SOFA score, BUN, LDH, Alcohol/non-alcohol liver disease, heart failure and chronic artery disease versus module membership in MEcyan and MEdarkred modules. Gene Significance (GS) indicate how significance the gene in the modules are significant to the trait and Module Membership(MM)
